# Supplementary material for: Forbidden links, trait matching and modularity in plant-hummingbird networks: Are specialized modules characterized by higher phenotypic floral integration?
Source: PeerJ. 2021 Mar 10;9:e10974. doi: 10.7717/peerj.10974 (PMC7955668; doi:10.7717/peerj.10974)
Supplement: Supplemental Information 1 — Columns indicate the plant species, family and the different morphological/nectar variables measured. Rows represent individual measurements. [file peerj-09-10974-s001.xlsx]

## Sheet: Hoja1
Plant species	Species code	Famìly	Corolla length (mm)	Stamen length (mm)	Style lenght (mm)	Nectar volume (µl)	Nectar concentration (°Brix)
Aechmea bracteata	AECHBRACT	Bromeliaceae	9.52	8.22	8.22	0.98175	22.5
Aechmea bracteata	AECHBRACT	Bromeliaceae	10.21	8.66	8.66	1.23111	17
Aechmea bracteata	AECHBRACT	Bromeliaceae	10.19	8.65	8.65	1.5708	22.5
Aechmea bracteata	AECHBRACT	Bromeliaceae				1.35089	23
Aechmea bracteata	AECHBRACT	Bromeliaceae	11.14	9.5	9.5	0.922845	24
Aechmea bracteata	AECHBRACT	Bromeliaceae	10.14	9.6	9.6	0.918918	17.5
Aechmea bracteata	AECHBRACT	Bromeliaceae	9.26	8.73	8.73	0.883575	23
Aechmea bracteata	AECHBRACT	Bromeliaceae	10.63	9.63	9.63
Aechmea bracteata	AECHBRACT	Bromeliaceae	10.07	9	9
Aechmea bracteata	AECHBRACT	Bromeliaceae	9.87	8	8
Aechmea bracteata	AECHBRACT	Bromeliaceae	10.2	9.4	9.4
Aechmea bracteata	AECHBRACT	Bromeliaceae	9.8	9.1	9.1
Aechmea bracteata	AECHBRACT	Bromeliaceae	10.11	9.2	9.2
Aechmea bracteata	AECHBRACT	Bromeliaceae	9.6	8.28	8.28
Aechmea bracteata	AECHBRACT	Bromeliaceae	9.34	8.71	8.71
Aechmea bracteata	AECHBRACT	Bromeliaceae	10.7	8.22	8.22
Aechmea bracteata	AECHBRACT	Bromeliaceae	9.9	8.5	8.5
Aechmea bracteata	AECHBRACT	Bromeliaceae	10	8.94	8.94
Aechmea bracteata	AECHBRACT	Bromeliaceae	10.47	8.66	8.66
Aechmea bracteata	AECHBRACT	Bromeliaceae	10.07	9.33	9.33	4.00554	20
Aechmea bracteata	AECHBRACT	Bromeliaceae	9.7	8.73	8.73	5.46246	20
Aechmea bracteata	AECHBRACT	Bromeliaceae	9.36	8.23	8.23	4.12924	20
Aechmea bracteata	AECHBRACT	Bromeliaceae	10.2	8.9	8.9	2.65662	20.5
Aechmea bracteata	AECHBRACT	Bromeliaceae	9.32	8.18	8.18	3.29868	21
Aechmea bracteata	AECHBRACT	Bromeliaceae	10.83	9.79	9.79	5.69415	20.5
Aechmea bracteata	AECHBRACT	Bromeliaceae	9.49
Aechmea bracteata	AECHBRACT	Bromeliaceae	10.74
Aechmea bracteata	AECHBRACT	Bromeliaceae	10.42
Aechmea bracteata	AECHBRACT	Bromeliaceae	10.81
Aechmea bracteata	AECHBRACT	Bromeliaceae	10.45
Aechmea bracteata	AECHBRACT	Bromeliaceae	10.21
Aechmea bracteata	AECHBRACT	Bromeliaceae	10.04
Aechmea bracteata	AECHBRACT	Bromeliaceae	10.47
Aechmea bracteata	AECHBRACT	Bromeliaceae	10.57
Aechmea bracteata	AECHBRACT	Bromeliaceae	10.89
Aechmea bracteata	AECHBRACT	Bromeliaceae	10.9
Aechmea tillandsioides	AECHTILL	Bromeliaceae	23.9	23.9	23.9	13.9998	25
Aechmea tillandsioides	AECHTILL	Bromeliaceae	20.71	20.71	20.71	6.81727	23.5
Aechmea tillandsioides	AECHTILL	Bromeliaceae	24.23	24.23	24.23	14.7263	25
Aechmea tillandsioides	AECHTILL	Bromeliaceae	23.9	23.9	23.9	14.0272	24.5
Aechmea tillandsioides	AECHTILL	Bromeliaceae	24.23	24.23	24.23	14.7263	25
Aechmea tillandsioides	AECHTILL	Bromeliaceae	23.9	23.9	23.9	14.0272	24.5
Aechmea tillandsioides	AECHTILL	Bromeliaceae	24.2	24.2	24.2	12.4702	24.5
Aechmea tillandsioides	AECHTILL	Bromeliaceae	19.15	19.15	19.15	6.1811	21
Aechmea tillandsioides	AECHTILL	Bromeliaceae	19.5	19.5	19.5	9.64668	24
Aechmea tillandsioides	AECHTILL	Bromeliaceae	22.06	22.06	22.06	11.9283	23
Aechmea tillandsioides	AECHTILL	Bromeliaceae	25	22.5	25	7.55947	22.5
Androlepis skinneri	ANDSKI	Bromeliaceae	10.78
Androlepis skinneri	ANDSKI	Bromeliaceae	9.58
Androlepis skinneri	ANDSKI	Bromeliaceae	9.78
Androlepis skinneri	ANDSKI	Bromeliaceae	10.05
Androlepis skinneri	ANDSKI	Bromeliaceae	10.12
Androlepis skinneri	ANDSKI	Bromeliaceae	10.3
Androlepis skinneri	ANDSKI	Bromeliaceae	9.8
Androlepis skinneri	ANDSKI	Bromeliaceae	10.55
Androlepis skinneri	ANDSKI	Bromeliaceae	10.8
Androlepis skinneri	ANDSKI	Bromeliaceae	10.5
Androlepis skinneri	ANDSKI	Bromeliaceae	10.2
Androlepis skinneri	ANDSKI	Bromeliaceae	10
Androlepis skinneri	ANDSKI	Bromeliaceae	10.3
Androlepis skinneri	ANDSKI	Bromeliaceae	10.7
Androlepis skinneri	ANDSKI	Bromeliaceae	9.7
Androlepis skinneri	ANDSKI	Bromeliaceae	10.35
Androlepis skinneri	ANDSKI	Bromeliaceae	10.35
Androlepis skinneri	ANDSKI	Bromeliaceae	10.58			20.224	23
Androlepis skinneri	ANDSKI	Bromeliaceae	11.43			14.7263	20
Androlepis skinneri	ANDSKI	Bromeliaceae	10.92			28.8635	20
Androlepis skinneri	ANDSKI	Bromeliaceae	11.6			18.8948	21
Androlepis skinneri	ANDSKI	Bromeliaceae	11.17			21.571	22
Androlepis skinneri	ANDSKI	Bromeliaceae	11.05
Androlepis skinneri	ANDSKI	Bromeliaceae	11.43
Androlepis skinneri	ANDSKI	Bromeliaceae	10.58
Androlepis skinneri	ANDSKI	Bromeliaceae	10.4
Androlepis skinneri	ANDSKI	Bromeliaceae	10.62			24.5437	21
Androlepis skinneri	ANDSKI	Bromeliaceae	10.05			32.3978	23
Androlepis skinneri	ANDSKI	Bromeliaceae	12.07			38.8773	21.5
Androlepis skinneri	ANDSKI	Bromeliaceae	11.28			29.6488	21
Androlepis skinneri	ANDSKI	Bromeliaceae	9.93			29.4525	22
Androlepis skinneri	ANDSKI	Bromeliaceae	10.81			35.343	23
Androlepis skinneri	ANDSKI	Bromeliaceae	10.7			19.635	20.5
Androlepis skinneri	ANDSKI	Bromeliaceae	11.72			38.681	22.5
Androlepis skinneri	ANDSKI	Bromeliaceae	10.07
Androlepis skinneri	ANDSKI	Bromeliaceae	11.75
Androlepis skinneri	ANDSKI	Bromeliaceae	10.19
Androlepis skinneri	ANDSKI	Bromeliaceae	11.23
Androlepis skinneri	ANDSKI	Bromeliaceae	9.83
Androlepis skinneri	ANDSKI	Bromeliaceae	11.47			51.051	22.5
Androlepis skinneri	ANDSKI	Bromeliaceae	10.41			25.5255	21
Androlepis skinneri	ANDSKI	Bromeliaceae	11.82			16.9705	22
Androlepis skinneri	ANDSKI	Bromeliaceae	10.08			45.8124	21.5
Androlepis skinneri	ANDSKI	Bromeliaceae	10.21			42.8043	22.5
Androlepis skinneri	ANDSKI	Bromeliaceae	11.04			34.5576	21
Androlepis skinneri	ANDSKI	Bromeliaceae	10.14			43.0007	21.5
Androlepis skinneri	ANDSKI	Bromeliaceae	10.52			20.5461	22.5
Androlepis skinneri	ANDSKI	Bromeliaceae	10.6			24.5437	19
Androlepis skinneri	ANDSKI	Bromeliaceae	10			35.343	21
Androlepis skinneri	ANDSKI	Bromeliaceae	9.57			26.5072	21
Androlepis skinneri	ANDSKI	Bromeliaceae	10.22			35.9929	21.5
Androlepis skinneri	ANDSKI	Bromeliaceae	10.8			44.5714	23
Androlepis skinneri	ANDSKI	Bromeliaceae	10.27			32.7904	23
Androlepis skinneri	ANDSKI	Bromeliaceae	9.3
Androlepis skinneri	ANDSKI	Bromeliaceae	11.19			29.9257	21.5
Androlepis skinneri	ANDSKI	Bromeliaceae	9.8			35.343	21.5
Androlepis skinneri	ANDSKI	Bromeliaceae	22.7982
Androlepis skinneri	ANDSKI	Bromeliaceae	11.8	10.3
Androlepis skinneri	ANDSKI	Bromeliaceae
Androlepis skinneri	ANDSKI	Bromeliaceae
Androlepis skinneri	ANDSKI	Bromeliaceae	12	9.5
Androlepis skinneri	ANDSKI	Bromeliaceae	10.9	9.5
Androlepis skinneri	ANDSKI	Bromeliaceae	10.7	9.8
Androlepis skinneri	ANDSKI	Bromeliaceae	10	8
Androlepis skinneri	ANDSKI	Bromeliaceae	10	7.5
Androlepis skinneri	ANDSKI	Bromeliaceae	10.2	8.6
Androlepis skinneri	ANDSKI	Bromeliaceae	10.5	9.5
Androlepis skinneri	ANDSKI	Bromeliaceae	10	9
Androlepis skinneri	ANDSKI	Bromeliaceae	10.5	7.5
Androlepis skinneri	ANDSKI	Bromeliaceae	10.1	9.8
Androlepis skinneri	ANDSKI	Bromeliaceae	10.8	9.5
Androlepis skinneri	ANDSKI	Bromeliaceae	11	9.7
Androlepis skinneri	ANDSKI	Bromeliaceae	10.7	8.2
Androlepis skinneri	ANDSKI	Bromeliaceae	10.2	9.7
Androlepis skinneri	ANDSKI	Bromeliaceae	11	8.3
Androlepis skinneri	ANDSKI	Bromeliaceae	10.3	8.4
Androlepis skinneri	ANDSKI	Bromeliaceae	11.5	9
Androlepis skinneri	ANDSKI	Bromeliaceae	11	8.5
Androlepis skinneri	ANDSKI	Bromeliaceae	10.5	8.3
Androlepis skinneri	ANDSKI	Bromeliaceae	10.5	8.3
Androlepis skinneri	ANDSKI	Bromeliaceae	10.7	8.4
Androlepis skinneri	ANDSKI	Bromeliaceae	9.6	7.8
Androlepis skinneri	ANDSKI	Bromeliaceae	10.4	8.2
Androlepis skinneri	ANDSKI	Bromeliaceae	10	8.1
Androlepis skinneri	ANDSKI	Bromeliaceae	10.3	8.3
Androlepis skinneri	ANDSKI	Bromeliaceae	9.3	7.5
Billbergia viridiflora	BILLVIR	Bromeliaceae	43.28	8.65
Billbergia viridiflora	BILLVIR	Bromeliaceae	42.21	55.21	58
Billbergia viridiflora	BILLVIR	Bromeliaceae	41.78	56	57.9
Billbergia viridiflora	BILLVIR	Bromeliaceae	42.98	55.92	59.89
Billbergia viridiflora	BILLVIR	Bromeliaceae	42.38	53.63	58
Billbergia viridiflora	BILLVIR	Bromeliaceae	42.9	52.3	55.32
Billbergia viridiflora	BILLVIR	Bromeliaceae	43.8	55.32
Billbergia viridiflora	BILLVIR	Bromeliaceae	42.5	53.17	57.05
Billbergia viridiflora	BILLVIR	Bromeliaceae	42.68	55.73	57.63
Billbergia viridiflora	BILLVIR	Bromeliaceae	41.72	56.31	56.35
Billbergia viridiflora	BILLVIR	Bromeliaceae	41.76	53.56	56.38	21.5985	28.5
Billbergia viridiflora	BILLVIR	Bromeliaceae	42.29	54.5	55.6	15.708	28
Billbergia viridiflora	BILLVIR	Bromeliaceae	41.43	56.13	56.23	24.5437	27.5
Billbergia viridiflora	BILLVIR	Bromeliaceae	42.53	53.5	59.3	12.7628	25
Billbergia viridiflora	BILLVIR	Bromeliaceae	43.5	55	57.5	27.6853	28.5
Bromelia pinguin	BROPIN	Bromeliaceae	32.32
Bromelia pinguin	BROPIN	Bromeliaceae	32.3
Bromelia pinguin	BROPIN	Bromeliaceae	30
Calathea lutea	CALLUT	Marantaceae
Calathea lutea	CALLUT	Marantaceae	29.08	29.29	38.53
Calathea lutea	CALLUT	Marantaceae	29.51	30.9	41.31
Calathea lutea	CALLUT	Marantaceae	29.97	31.45	39.82
Calathea lutea	CALLUT	Marantaceae	28.08	29.82	40.18
Calathea lutea	CALLUT	Marantaceae		28.14	40.5
Calathea lutea	CALLUT	Marantaceae	29.7	30.31	40.6
Calathea lutea	CALLUT	Marantaceae	29.8		39.68	10.5047	35
Calathea lutea	CALLUT	Marantaceae	29.94	33.51	40.21	10.1709	36.5
Calathea lutea	CALLUT	Marantaceae		32.38	38.21	18.6591	36
Calathea lutea	CALLUT	Marantaceae	29.47	34.05	39.74	10.0963	37
Calathea lutea	CALLUT	Marantaceae	29.2	30.98	39.83	14.3983	37
Calathea lutea	CALLUT	Marantaceae	30.84	33.52	40.73	9.77627	37
Calathea lutea	CALLUT	Marantaceae	29.8	32.95	39.68	9.84695	37
Calathea lutea	CALLUT	Marantaceae				12.5801	36.5
Calathea lutea	CALLUT	Marantaceae	29.81		39.6	12.4682	37.5
Calathea lutea	CALLUT	Marantaceae				15.9633	37
Calathea lutea	CALLUT	Marantaceae	29.81	33.11	39.73	17.0334	37.5
Calathea lutea	CALLUT	Marantaceae	29.5	33.43	39.74	9.87641	37
Calathea lutea	CALLUT	Marantaceae	30.2	31.5	38.3
Calathea lutea	CALLUT	Marantaceae		34	40.5	15.708	36
Calathea lutea	CALLUT	Marantaceae	30	34.1	40	18.3587	36
Calathea lutea	CALLUT	Marantaceae	29.64	34.24	39.67	15.0954	37
Calathea lutea	CALLUT	Marantaceae	29.16	32.69	40.05	18.8201	37.5
Calathea lutea	CALLUT	Marantaceae	29.29	34.36	41.75	15.9711	38.5
Calathea lutea	CALLUT	Marantaceae		32.8	38.47	12.6999	37.5
Calathea lutea	CALLUT	Marantaceae	29.17	32.91		13.6738	38.5
Calathea lutea	CALLUT	Marantaceae		34.24	39.07	10.9779	38
Calathea lutea	CALLUT	Marantaceae		33.84	41.66	15.9083	37
Catopsis berteroniana	CATBER	Bromeliaceae
Catopsis berteroniana	CATBER	Bromeliaceae
Catopsis berteroniana	CATBER	Bromeliaceae
Catopsis berteroniana	CATBER	Bromeliaceae
Catopsis berteroniana	CATBER	Bromeliaceae
Catopsis berteroniana	CATBER	Bromeliaceae
Catopsis berteroniana	CATBER	Bromeliaceae
Catopsis berteroniana	CATBER	Bromeliaceae	12.2	9.4	9.4
Catopsis berteroniana	CATBER	Bromeliaceae	12	9.5	9.5
Catopsis berteroniana	CATBER	Bromeliaceae	12.5	9.6	9.6
Catopsis berteroniana	CATBER	Bromeliaceae	12	9.5	9.5
Catopsis berteroniana	CATBER	Bromeliaceae	12.2	9.6	9.6
Catopsis berteroniana	CATBER	Bromeliaceae	11.5	9.5	9.5	17.6709	17.5
Catopsis berteroniana	CATBER	Bromeliaceae	10	8.5	8.5	13.9404	17.5
Catopsis berteroniana	CATBER	Bromeliaceae	11	9.8	9.8	14.6276	17
Catopsis berteroniana	CATBER	Bromeliaceae	11.2	8.2	8.2	17.0819	17
Catopsis berteroniana	CATBER	Bromeliaceae	11.1	9.2	9.2	29.6479	16.5
Catopsis berteroniana	CATBER	Bromeliaceae	10	9	9	10.2099	17.5
Catopsis berteroniana	CATBER	Bromeliaceae	12	9	9	27.0954	18.5
Catopsis berteroniana	CATBER	Bromeliaceae	12	9.5	9.5	25.5247	18.5
Catopsis berteroniana	CATBER	Bromeliaceae	12	9.5	9.5	22.9722	20
Catopsis berteroniana	CATBER	Bromeliaceae	12.5	9.5	9.5	20.2234	20
Catopsis berteroniana	CATBER	Bromeliaceae	12	8.5	8.5	24.543	19.5
Catopsis berteroniana	CATBER	Bromeliaceae	12.5	10	10	25.5247	17.5
Costus scaber	COSSCA	Costaceae	48.38	51.38	52.08
Costus scaber	COSSCA	Costaceae	47.51	50.26	50.96
Costus scaber	COSSCA	Costaceae	49.58	52.33	53.03
Costus scaber	COSSCA	Costaceae	47.53	50.28	50.98
Costus scaber	COSSCA	Costaceae	49.76	52.51	53.21
Costus scaber	COSSCA	Costaceae	48.56	51.31	52.01
Costus scaber	COSSCA	Costaceae	47.74	50.49	51.19
Costus scaber	COSSCA	Costaceae	47.79	50.54	51.24
Costus scaber	COSSCA	Costaceae	45.78	48.53	49.23
Costus scaber	COSSCA	Costaceae	48.75	51.5	52.2
Costus scaber	COSSCA	Costaceae	46.81	49.56	50.26
Costus scaber	COSSCA	Costaceae	47.33	50.08	50.78
Costus scaber	COSSCA	Costaceae
Costus scaber	COSSCA	Costaceae	44.8	47.55	48.25
Costus scaber	COSSCA	Costaceae				63.2247	34
Costus scaber	COSSCA	Costaceae	43.65	46.4	47.1
Costus scaber	COSSCA	Costaceae	48.14	50.89	51.59
Costus scaber	COSSCA	Costaceae				51.051	12.5
Costus scaber	COSSCA	Costaceae				25.5255	19.5
Costus scaber	COSSCA	Costaceae				16.1792	19.5
Costus scaber	COSSCA	Costaceae				32.1032	29
Costus scaber	COSSCA	Costaceae	46.32	49.41	50.07
Costus scaber	COSSCA	Costaceae	46.29	49.39	50.1
Costus scaber	COSSCA	Costaceae	43.8	45.6	46.3
Costus scaber	COSSCA	Costaceae	45.69	50.84	52.25
Costus scaber	COSSCA	Costaceae	43.6	46.24	48.34
Costus scaber	COSSCA	Costaceae	45.2
Costus scaber	COSSCA	Costaceae				31.8892	25
Costus scaber	COSSCA	Costaceae
Costus scaber	COSSCA	Costaceae	51.46	54.1	55.3	73.0422	32
Costus scaber	COSSCA	Costaceae	51.66	54.21	55.75	61.3005	30.5
Costus scaber	COSSCA	Costaceae	42.21
Costus scaber	COSSCA	Costaceae	40.71
Costus scaber	COSSCA	Costaceae
Costus scaber	COSSCA	Costaceae
Costus scaber	COSSCA	Costaceae	47.14	52.98	55.76	14.4514	21.5
Costus scaber	COSSCA	Costaceae	54.77			51.534	24.5
Costus scaber	COSSCA	Costaceae	51.52	52.94	54.37
Costus scaber	COSSCA	Costaceae	50.13	54.5	55.73	9.7743	22.5
Costus scaber	COSSCA	Costaceae	56.61	53.61	55.31	45.3294	32
Costus scaber	COSSCA	Costaceae	51.67	54.43	55.62	33.9371	30
Costus scaber	COSSCA	Costaceae	49.68	51.62	53.04
Costus scaber	COSSCA	Costaceae	47.8	52.92	49.85	4.51605	25
Costus scaber	COSSCA	Costaceae	42.2
Costus scaber	COSSCA	Costaceae	37.78
Costus scaber	COSSCA	Costaceae	45.6	47.34	48.93
Costus scaber	COSSCA	Costaceae	46	49	53.29	5.1051	23
Costus scaber	COSSCA	Costaceae	50.7			9.92549	28
Costus spicatus	COSPIC	Costaceae		54
Costus spicatus	COSPIC	Costaceae	75.97	48.05	59.38
Costus spicatus	COSPIC	Costaceae	78.8	50	60.1
Costus spicatus	COSPIC	Costaceae	73	55	58.5
Costus spicatus	COSPIC	Costaceae	76.5	55	58.2
Costus spicatus	COSPIC	Costaceae	78	56	61
Costus spicatus	COSPIC	Costaceae		55	56.5	35.1467	32.5
Costus spicatus	COSPIC	Costaceae			55.5	51.051	36
Costus spicatus	COSPIC	Costaceae	73.5	55	57.5
Costus spicatus	COSPIC	Costaceae	73.5	54.1	57.5	45.1605	37
Costus spicatus	COSPIC	Costaceae	73	57.5	61
Costus spicatus	COSPIC	Costaceae	76.5	57.5	59.5	80.1108	38
Costus spicatus	COSPIC	Costaceae			58.5	57.9232	31
Costus spicatus	COSPIC	Costaceae	70	54	56	10.6029	30
Costus spicatus	COSPIC	Costaceae		55	57	29.6488	31
Erythrina folkersii	ERYFOL	Fabaceae	73.5	64.5	56.5
Erythrina folkersii	ERYFOL	Fabaceae	73.8	63.5	57.3
Erythrina folkersii	ERYFOL	Fabaceae	73.2	62.8	57.1
Erythrina folkersii	ERYFOL	Fabaceae	72.7	63.7	54.2
Erythrina folkersii	ERYFOL	Fabaceae	73.8	65	59.5
Erythrina folkersii	ERYFOL	Fabaceae	79.5	69.5	61.9	32.1032	18
Erythrina folkersii	ERYFOL	Fabaceae	75.6	64.8	55.7
Erythrina folkersii	ERYFOL	Fabaceae	77.5	68	57.9	13.3518	18
Erythrina folkersii	ERYFOL	Fabaceae	77.1	66	58.8
Erythrina folkersii	ERYFOL	Fabaceae	76.5	64	59.5	9.8175	16
Erythrina folkersii	ERYFOL	Fabaceae			60.3
Erythrina folkersii	ERYFOL	Fabaceae	74.2	62.5	56	21.0095	16
Erythrina folkersii	ERYFOL	Fabaceae	75.1	66.5	57.1	16.6898	16
Erythrina folkersii	ERYFOL	Fabaceae			56.3	21.5985	22
Erythrina folkersii	ERYFOL	Fabaceae	74.6	64.2	57.1	10.9956	17
Erythrina folkersii	ERYFOL	Fabaceae	79.8	65.1	56.3	22.1875	17
Erythrina folkersii	ERYFOL	Fabaceae	76.8	66.1	60	5.8905	17
Erythrina folkersii	ERYFOL	Fabaceae	75.1	66	58	16.297	20
Erythrina folkersii	ERYFOL	Fabaceae	74.5	66	56.9
Erythrina folkersii	ERYFOL	Fabaceae	75.8	64.3	57.9	11.781	17
Erythrina folkersii	ERYFOL	Fabaceae	74	63	56.3
Heliconia aurantiaca	HELAUR	Heliconiaceae	49.5			37.3065	24
Heliconia aurantiaca	HELAUR	Heliconiaceae	50.12
Heliconia aurantiaca	HELAUR	Heliconiaceae	49.68		45.9	32.3978	18.5
Heliconia aurantiaca	HELAUR	Heliconiaceae	47.57	57.6	45.27	30.6306	18
Heliconia aurantiaca	HELAUR	Heliconiaceae	48.2	52.68	46.27	19.9001	19.5
Heliconia aurantiaca	HELAUR	Heliconiaceae	49.74	55.87	46.97
Heliconia aurantiaca	HELAUR	Heliconiaceae	51.39	58.55	47.24
Heliconia aurantiaca	HELAUR	Heliconiaceae	53.76	60.05	48.97
Heliconia aurantiaca	HELAUR	Heliconiaceae	53.6	60.49	48.97	27.0963	26
Heliconia aurantiaca	HELAUR	Heliconiaceae	51.61	56.07	48.27	37.5107	24.5
Heliconia aurantiaca	HELAUR	Heliconiaceae	51.94	57.41	50.42	34.9228	27
Heliconia aurantiaca	HELAUR	Heliconiaceae	52.3		50.4
Heliconia aurantiaca	HELAUR	Heliconiaceae	55.6	60.25	51.55
Heliconia aurantiaca	HELAUR	Heliconiaceae	52.34	56.54	49.8	67.7408	18
Heliconia aurantiaca	HELAUR	Heliconiaceae	52.12	59.59	50.34	47.124	26
Heliconia aurantiaca	HELAUR	Heliconiaceae	52.61	58.41	48.62	43.1067	20
Heliconia aurantiaca	HELAUR	Heliconiaceae	53.02	57.34	49.8
Heliconia aurantiaca	HELAUR	Heliconiaceae	51.73	57.84	50.19	25.5255	26.5
Heliconia aurantiaca	HELAUR	Heliconiaceae	53.17	56.69	49.44	41.5496	20
Heliconia aurantiaca	HELAUR	Heliconiaceae	54.92	57.98	49.27	54.4596	21.5
Heliconia aurantiaca	HELAUR	Heliconiaceae	53.88	58.29	50.38	62.7554	23.5
Heliconia aurantiaca	HELAUR	Heliconiaceae	52.37	57.41	48.39
Heliconia collinsiana	HELCOLL	Heliconiaceae	53	60	53	61.4575	28
Heliconia collinsiana	HELCOLL	Heliconiaceae	53.63	59	52	52.1133	29
Heliconia collinsiana	HELCOLL	Heliconiaceae	55	60.61	53.58	103.889	31
Heliconia collinsiana	HELCOLL	Heliconiaceae	52.76	60.35	53.15	70.2933	29
Heliconia collinsiana	HELCOLL	Heliconiaceae	52.47	60.72	52.73	55.0173	31.5
Heliconia collinsiana	HELCOLL	Heliconiaceae	53.52	61.35	53.24	79.8006	31.5
Heliconia collinsiana	HELCOLL	Heliconiaceae	52.53	61.2	53.01	59.4548	31.5
Heliconia collinsiana	HELCOLL	Heliconiaceae	53.74	63.41	53.05	106.284	26
Heliconia collinsiana	HELCOLL	Heliconiaceae	53.37	61.7	53.05	85.1963	31
Heliconia collinsiana	HELCOLL	Heliconiaceae	53.05	58.84	52.9	115.945	29.5
Heliconia collinsiana	HELCOLL	Heliconiaceae	52.47	59.23	53.74	57.1673	27
Heliconia collinsiana	HELCOLL	Heliconiaceae	51.63	61.86	51.79	22.2465	19
Heliconia collinsiana	HELCOLL	Heliconiaceae	50.87	62.63	51.02	96.2115	26.5
Heliconia collinsiana	HELCOLL	Heliconiaceae	50.12	61.46	49.5	68.1334	20
Heliconia collinsiana	HELCOLL	Heliconiaceae	51.81	63.54	51.86	119.434	22
Heliconia collinsiana	HELCOLL	Heliconiaceae	51.6	62.39	51.43	31.416	29
Heliconia collinsiana	HELCOLL	Heliconiaceae	52.71		49.44	48.1058	24
Heliconia collinsiana	HELCOLL	Heliconiaceae	50.39	64.22	52.05	62.832	15.5
Heliconia collinsiana	HELCOLL	Heliconiaceae	54.29	64.94	55.03	45.7967	26
Heliconia collinsiana	HELCOLL	Heliconiaceae	52.49	64.02	54.39	81.2889	26
Heliconia collinsiana	HELCOLL	Heliconiaceae	53	61.21	55.55	64.6639	14.5
Heliconia collinsiana	HELCOLL	Heliconiaceae	52.71	60.79	53.55	59.2486	25.5
Heliconia collinsiana	HELCOLL	Heliconiaceae	54.19	60.91	52.77	86.7867	31.5
Heliconia collinsiana	HELCOLL	Heliconiaceae	53.92	60.63	52.85	84.725	31
Heliconia collinsiana	HELCOLL	Heliconiaceae	51.6	56.2	51.07	5.8905	11
Heliconia collinsiana	HELCOLL	Heliconiaceae	54.15	60.64	53.2	85.805	33.5
Heliconia collinsiana	HELCOLL	Heliconiaceae	52	61.42	52.44	77.6466	32.5
Heliconia collinsiana	HELCOLL	Heliconiaceae	52.5	64.36	53.38	59.2447	32
Heliconia collinsiana	HELCOLL	Heliconiaceae	53.21	60	53.93	91.7936	34
Heliconia collinsiana	HELCOLL	Heliconiaceae	52.42	57.89	53.04	86.394	27.5
Heliconia collinsiana	HELCOLL	Heliconiaceae	54.02	58.08	54.9	94.0516	29
Heliconia collinsiana	HELCOLL	Heliconiaceae	53.2	60.95		60.4994	27.5
Heliconia collinsiana	HELCOLL	Heliconiaceae	54.2	64.11	55.01	79.3254	26.5
Heliconia collinsiana	HELCOLL	Heliconiaceae	53.77	61.79	53.2	0.716677	27
Heliconia collinsiana	HELCOLL	Heliconiaceae	53.31	61.18	52.07	59.8867	31
Heliconia collinsiana	HELCOLL	Heliconiaceae	51.85	63.66	52.55	9.57206	33.5
Heliconia collinsiana	HELCOLL	Heliconiaceae	52.34	63.3	53.11	53.2109	29
Heliconia collinsiana	HELCOLL	Heliconiaceae	51.87	64.29	53.93	98.175	26.5
Heliconia collinsiana	HELCOLL	Heliconiaceae	54.45	64.9	53.38	30.0612	32.5
Heliconia collinsiana	HELCOLL	Heliconiaceae	52.23	61.42	52.51	51.6401	27
Heliconia collinsiana	HELCOLL	Heliconiaceae	53.83	64.85	54.01	25.5255	31.5
Heliconia collinsiana	HELCOLL	Heliconiaceae	52.85	63.15	53.9	23.562	18
Heliconia collinsiana	HELCOLL	Heliconiaceae	51.97	63.64	53.31	54.978	30
Heliconia collinsiana	HELCOLL	Heliconiaceae	50.89	61.5	52.76	81.5991	21
Heliconia collinsiana	HELCOLL	Heliconiaceae	52.42	64.38	53.68	35.5393	34
Heliconia collinsiana	HELCOLL	Heliconiaceae	51.41	63.5	53.08	59.6904	17.5
Heliconia collinsiana	HELCOLL	Heliconiaceae	50.87	55.24	53.17	68.7225	16
Heliconia collinsiana	HELCOLL	Heliconiaceae	50.49	63.94	52.05	39.27	18
Heliconia collinsiana	HELCOLL	Heliconiaceae	52.2	60.6	50.25	84.9803	22
Heliconia collinsiana	HELCOLL	Heliconiaceae	52.47	63.86	51.87	102.102	23
Heliconia collinsiana	HELCOLL	Heliconiaceae	53.37	61.23	53.38	85.805	28.5
Heliconia collinsiana	HELCOLL	Heliconiaceae	53.41	59.92	50.66	62.6356	26.5
Heliconia collinsiana	HELCOLL	Heliconiaceae	52.6	58.4	52.51	84.5483	28.5
Heliconia collinsiana	HELCOLL	Heliconiaceae	52.55	63.81	53.38	76.5765	30.5
Heliconia collinsiana	HELCOLL	Heliconiaceae	51.19	61.08	50.97	40.4481	28
Heliconia collinsiana	HELCOLL	Heliconiaceae	53.34	60.07	52.25	29.3013	25.5
Heliconia collinsiana	HELCOLL	Heliconiaceae	51.74	60.64	51.02	27.1552	18.5
Heliconia collinsiana	HELCOLL	Heliconiaceae	52.9	60.51		60.4758	29
Heliconia collinsiana	HELCOLL	Heliconiaceae	52	61.4	51.7	55.4689	33.5
Heliconia collinsiana	HELCOLL	Heliconiaceae	52.79	54.06		85.4123	26
Heliconia collinsiana	HELCOLL	Heliconiaceae	53.32	56.47	52.46	26.5995	37.5
Heliconia collinsiana	HELCOLL	Heliconiaceae	52.68	60.95	53.62	57.1182	29
Heliconia collinsiana	HELCOLL	Heliconiaceae	52.6	60.66	52.5	84.8232	33
Heliconia collinsiana	HELCOLL	Heliconiaceae	53.01	55.4	53.14	30.0416	34
Heliconia collinsiana	HELCOLL	Heliconiaceae	54.37	60.1	53.9	121.737	31
Heliconia collinsiana	HELCOLL	Heliconiaceae	53.06	61.65	54.22	89.3392	28.5
Heliconia collinsiana	HELCOLL	Heliconiaceae	53.22	62.5	51.9	68.7225	15
Heliconia collinsiana	HELCOLL	Heliconiaceae	53.17	62.54	53.87	31.416	32
Heliconia collinsiana	HELCOLL	Heliconiaceae	53.02	61.11	53.92	53.6369	28.5
Heliconia collinsiana	HELCOLL	Heliconiaceae	53.34	56.8	52.29	43.197	24.5
Heliconia collinsiana	HELCOLL	Heliconiaceae	52.31	58.08	53.1	30.4342	31.5
Heliconia collinsiana	HELCOLL	Heliconiaceae	53.19	58.07	53.71	83.056	34
Heliconia collinsiana	HELCOLL	Heliconiaceae		61.81	53.97	7.854	30.5
Heliconia collinsiana	HELCOLL	Heliconiaceae		60.68	50.59	48.793	22.5
Heliconia collinsiana	HELCOLL	Heliconiaceae	53.39	65.07	53.55	69.7043	17
Heliconia collinsiana	HELCOLL	Heliconiaceae	51.75	57.86	52	26.9981	30.5
Heliconia collinsiana	HELCOLL	Heliconiaceae	52.41	60.24	52.09	71.762	27.5
Heliconia collinsiana	HELCOLL	Heliconiaceae	53.35	65	53.85	66.759	13.5
Heliconia collinsiana	HELCOLL	Heliconiaceae	54.1	64.18	54.02	71.275	32
Heliconia collinsiana	HELCOLL	Heliconiaceae	52.49	61.5	53.36	2.7489	21.5
Heliconia collinsiana	HELCOLL	Heliconiaceae	53.11	58.5	52.66	82.467	31
Heliconia collinsiana	HELCOLL	Heliconiaceae	52.72	63.44	53.21	26.6447	32
Heliconia collinsiana	HELCOLL	Heliconiaceae	51.63	60.61	50.27	94.6407	26
Heliconia collinsiana	HELCOLL	Heliconiaceae	53.12	61.52	54.02	83.8414	25
Heliconia collinsiana	HELCOLL	Heliconiaceae	53.02	62.75	53.31	68.7225	20
Heliconia collinsiana	HELCOLL	Heliconiaceae	53.3	58.43	52.8	31.416	27
Heliconia collinsiana	HELCOLL	Heliconiaceae	52.73	64.03	52.62	45.9459	31.5
Heliconia collinsiana	HELCOLL	Heliconiaceae	52.78	64.47	53.95	57.0672	32
Heliconia collinsiana	HELCOLL	Heliconiaceae	51.63	63.96	53.73	68.7225	30
Heliconia collinsiana	HELCOLL	Heliconiaceae	52.77	57.94	52.6	29.0853	32
Heliconia collinsiana	HELCOLL	Heliconiaceae	52.63	57.37	55.33	130.573	22.5
Heliconia collinsiana	HELCOLL	Heliconiaceae	52.54	60.81	53.33	44.3751	27.5
Heliconia collinsiana	HELCOLL	Heliconiaceae	53.1	63	54.05	52.8181	19
Heliconia collinsiana	HELCOLL	Heliconiaceae	53.27	63.12	55	118.533	23
Heliconia collinsiana	HELCOLL	Heliconiaceae	52.71	57.84	51.92	55.1743	28
Heliconia collinsiana	HELCOLL	Heliconiaceae	53.17	62.26	52.41	61.4575	28
Heliconia collinsiana	HELCOLL	Heliconiaceae	52.48	59.21	52.53	27.0963	32.5
Heliconia collinsiana	HELCOLL	Heliconiaceae	52.26	61.08	49.04	29.4525	30
Heliconia collinsiana	HELCOLL	Heliconiaceae	51.69	62.09	52.31	81.2594	32
Heliconia collinsiana	HELCOLL	Heliconiaceae	52.68	58.83	52.07	59.4941	22
Heliconia collinsiana	HELCOLL	Heliconiaceae	54.45	59.73	54.57	28.2744	33
Heliconia collinsiana	HELCOLL	Heliconiaceae	53.88	62.49	55.53	85.0195	31
Heliconia collinsiana	HELCOLL	Heliconiaceae	53.46	60.93	53.2	37.6403	33.5
Heliconia collinsiana	HELCOLL	Heliconiaceae	52.49	60.53	52.01	3.59517	16
Heliconia collinsiana	HELCOLL	Heliconiaceae	53.44	61.5	53.5	36.1284	33.5
Heliconia collinsiana	HELCOLL	Heliconiaceae	55.27	65.04	55.1	0.687225	33
Heliconia collinsiana	HELCOLL	Heliconiaceae	54.59	62.64	55.56	91.8918	29.5
Heliconia collinsiana	HELCOLL	Heliconiaceae	53.95	58.98	54.14	59.4941	32
Heliconia collinsiana	HELCOLL	Heliconiaceae	53.89	61.73	52.4	29.4525	35
Heliconia collinsiana	HELCOLL	Heliconiaceae	53.09	63.16	52.86	34.3612	32.5
Heliconia collinsiana	HELCOLL	Heliconiaceae	52.8	60.09	52.47	55.6004	32.5
Heliconia collinsiana	HELCOLL	Heliconiaceae	53.12	59.13	47.13	11.3765	33
Heliconia collinsiana	HELCOLL	Heliconiaceae	52.66	64.04	54.35	26.1146	33
Heliconia collinsiana	HELCOLL	Heliconiaceae	54.35	62.13	54.57	34.3612	34.5
Heliconia collinsiana	HELCOLL	Heliconiaceae	55.48	61.2	57.87	82.467	31.5
Heliconia collinsiana	HELCOLL	Heliconiaceae	53.85	60.28	53.46	35.343	27.5
Heliconia collinsiana	HELCOLL	Heliconiaceae	53.96	58.26	54	5.69415	32
Heliconia collinsiana	HELCOLL	Heliconiaceae	54.4	59.12	53.4	2.94525	29
Heliconia collinsiana	HELCOLL	Heliconiaceae	53.94	62.51	52.86	2.05382	29
Heliconia collinsiana	HELCOLL	Heliconiaceae	52.8	58.14	53.63
Heliconia collinsiana	HELCOLL	Heliconiaceae	52.25		50.72
Heliconia collinsiana	HELCOLL	Heliconiaceae	50.9	61.76	52.4	44.5714	22
Heliconia collinsiana	HELCOLL	Heliconiaceae	52.61	62.21	52.9	60.8685	32
Heliconia collinsiana	HELCOLL	Heliconiaceae	52.74	61.2	51.51	31.416	32
Heliconia collinsiana	HELCOLL	Heliconiaceae	52.45	61.45		10.597	33.5
Heliconia collinsiana	HELCOLL	Heliconiaceae	52.38	63.44	53.88	27.489	33
Heliconia collinsiana	HELCOLL	Heliconiaceae	52.6	65.49	53.22	31.1922	33
Heliconia collinsiana	HELCOLL	Heliconiaceae	52.75	67.73	52.71	81.4852	30
Heliconia collinsiana	HELCOLL	Heliconiaceae	52.16	59.49	51.2	2.3562	21.5
Heliconia collinsiana	HELCOLL	Heliconiaceae	52.55	60.72	51.64	57.9232	28.5
Heliconia collinsiana	HELCOLL	Heliconiaceae	52.5	61.23	52.35	106.029	29
Heliconia collinsiana	HELCOLL	Heliconiaceae	53.22	62.15	52.24	20.0277	28
Heliconia collinsiana	HELCOLL	Heliconiaceae	53.34	59.37	52.68	70.686	17.5
Heliconia collinsiana	HELCOLL	Heliconiaceae	51.53	60.43	52.57	51.6401	31.5
Heliconia collinsiana	HELCOLL	Heliconiaceae	52.07	59.63	51.96	65.3846	30
Heliconia collinsiana	HELCOLL	Heliconiaceae	51.3	61.77	51.8	33.3795	31
Heliconia collinsiana	HELCOLL	Heliconiaceae	52.84	60.42	52.7	45.6514	21.5
Heliconia collinsiana	HELCOLL	Heliconiaceae	53.4	61.52	53.25	90.321	29
Heliconia collinsiana	HELCOLL	Heliconiaceae	52.34	59.27	53.09	82.9579	22
Heliconia collinsiana	HELCOLL	Heliconiaceae	52.69	60.59	51.9	93.2662	25
Heliconia collinsiana	HELCOLL	Heliconiaceae	53.17	58.97	54.33	59.5824	32.5
Heliconia collinsiana	HELCOLL	Heliconiaceae		62.98	54.2	46.3386	20.5
Heliconia collinsiana	HELCOLL	Heliconiaceae	54.01	60.29	53.53	68.1334	32
Heliconia collinsiana	HELCOLL	Heliconiaceae	54.6	58.72	52.5	103.084	32
Heliconia collinsiana	HELCOLL	Heliconiaceae	50.97	59	50	41.8225	31
Heliconia collinsiana	HELCOLL	Heliconiaceae	52.24	62.61	52.69	123.504	28.5
Heliconia collinsiana	HELCOLL	Heliconiaceae	52.37	58.35	51.26	76.5765	24.5
Heliconia collinsiana	HELCOLL	Heliconiaceae	54.24	60.21	53.12	51.051	16.5
Heliconia collinsiana	HELCOLL	Heliconiaceae		61.77	50.32	85.0195	22.5
Heliconia collinsiana	HELCOLL	Heliconiaceae	52.71	60.35	50.89	25.9182	24.5
Heliconia collinsiana	HELCOLL	Heliconiaceae	52.88	61.31	52.14	26.5072	21
Heliconia collinsiana	HELCOLL	Heliconiaceae	51.26	63.54	52.81	106.029	21.5
Heliconia collinsiana	HELCOLL	Heliconiaceae	52.49	63.94	52.8	69.7043	25
Heliconia collinsiana	HELCOLL	Heliconiaceae	57.82	60.56	52.83	27.489	33.5
Heliconia collinsiana	HELCOLL	Heliconiaceae	52.83	61.37	52.32	119.773	26
Heliconia collinsiana	HELCOLL	Heliconiaceae	50.82	60.17	52.47	35.7357	30.5
Heliconia collinsiana	HELCOLL	Heliconiaceae	53.05	59.66	51.69	109.956	31.5
Heliconia collinsiana	HELCOLL	Heliconiaceae	53.65	55.88	52.8	95.2297	29.5
Heliconia collinsiana	HELCOLL	Heliconiaceae	52.46	62.81	51.93	51.5419	28.5
Heliconia collinsiana	HELCOLL	Heliconiaceae	51.42	55.99	52.14	19.635	22.5
Heliconia collinsiana	HELCOLL	Heliconiaceae	53.15	60.71	53.19	96.2115	27.5
Heliconia collinsiana	HELCOLL	Heliconiaceae	53.71	55.35	54.26	24.9365	31
Heliconia collinsiana	HELCOLL	Heliconiaceae	53.48	57.58	53.18	18.6532	31.5
Heliconia collinsiana	HELCOLL	Heliconiaceae		60.12	53.74	22.5802	33.5
Heliconia collinsiana	HELCOLL	Heliconiaceae	52.17	60.54	54.21	28.6043	33
Heliconia collinsiana	HELCOLL	Heliconiaceae	52.4	61.9	52.69	152.171	21
Heliconia collinsiana	HELCOLL	Heliconiaceae	52.41	62.69	51.5	36.3248	31
Heliconia collinsiana	HELCOLL	Heliconiaceae	50.97	61.17	51.1	13.9408	23
Heliconia collinsiana	HELCOLL	Heliconiaceae	53.52	60.21	52.5	97.1932	20
Heliconia collinsiana	HELCOLL	Heliconiaceae	52.07	63.34	52.24	60.2794	27.5
Heliconia collinsiana	HELCOLL	Heliconiaceae	52.63	61.8	52.48	72.139	30.5
Heliconia collinsiana	HELCOLL	Heliconiaceae	50.06	59.05	52.8	18.8496	33.5
Heliconia collinsiana	HELCOLL	Heliconiaceae	51.11	55.85	50.89	111.919	27.5
Heliconia collinsiana	HELCOLL	Heliconiaceae	50.9	59.61	51.02	18.2605	32
Heliconia collinsiana	HELCOLL	Heliconiaceae	51.7	64.79	53.38	119.773	21
Heliconia collinsiana	HELCOLL	Heliconiaceae	53.37	62.86	54.56	80.5035	25
Heliconia collinsiana	HELCOLL	Heliconiaceae	53	64.81	53.97	8.83575	30
Heliconia collinsiana	HELCOLL	Heliconiaceae	51.88	60	50.59	85.4123	26
Heliconia collinsiana	HELCOLL	Heliconiaceae	51.56	63.41	51.12	53.9962	29
Heliconia collinsiana	HELCOLL	Heliconiaceae	52.12	64.97	52.12	80.8962	26.5
Heliconia latispatha	HELLAT	Heliconiaceae	37.4	37.7	37.7	58.0254	25
Heliconia latispatha	HELLAT	Heliconiaceae	37.5	41.36	41.36
Heliconia latispatha	HELLAT	Heliconiaceae	36.2	38.2	38.2	50.0692	21
Heliconia latispatha	HELLAT	Heliconiaceae	35.9	37.68	37.68	60.9667	25.5
Heliconia latispatha	HELLAT	Heliconiaceae	36.2	38.14	38.14	81.4852	26
Heliconia latispatha	HELLAT	Heliconiaceae	37.3	40.97	40.97
Heliconia latispatha	HELLAT	Heliconiaceae	35.83	39.5	39.5
Heliconia latispatha	HELLAT	Heliconiaceae	36.27	39.93	39.93
Heliconia latispatha	HELLAT	Heliconiaceae	35.67	38.49	38.49
Heliconia latispatha	HELLAT	Heliconiaceae	35.66	38.32	38.32	67.2695	25
Heliconia latispatha	HELLAT	Heliconiaceae	35.55	37.57	37.57	87.1794	24
Heliconia latispatha	HELLAT	Heliconiaceae	37.55	41.36	41.36	60.8685	25
Heliconia latispatha	HELLAT	Heliconiaceae	37.47	38.83	38.83	57.9232	24.5
Heliconia latispatha	HELLAT	Heliconiaceae	36.55	39.37	39.37	89.2745	25
Heliconia latispatha	HELLAT	Heliconiaceae	34.29	37.02	37.02	93.659	24
Heliconia latispatha	HELLAT	Heliconiaceae	37.1	40	40	93.4037	26.5
Heliconia latispatha	HELLAT	Heliconiaceae	36.71	39.82	39.82
Heliconia latispatha	HELLAT	Heliconiaceae	36.2	38.44	38.44	49.0875	26
Heliconia latispatha	HELLAT	Heliconiaceae	36.55	38.4	38.4	139.801	26
Heliconia latispatha	HELLAT	Heliconiaceae	35.72	38.06	38.06	51.051	25
Heliconia latispatha	HELLAT	Heliconiaceae	36.33	38.36	38.36	133.911	25
Heliconia latispatha	HELLAT	Heliconiaceae	36.56	38.15	38.15	59.1013	25
Heliconia latispatha	HELLAT	Heliconiaceae	36.15	39.28	39.28	93.7179	26
Heliconia latispatha	HELLAT	Heliconiaceae	36.24	40.45	40.45
Heliconia latispatha	HELLAT	Heliconiaceae	36.8	39.45	39.45	62.832	25
Heliconia latispatha	HELLAT	Heliconiaceae	34.6	37.43	37.43	68.4731	27
Heliconia latispatha	HELLAT	Heliconiaceae	36	39.2	39.2	23.562	19
Heliconia latispatha	HELLAT	Heliconiaceae	39	40	40
Heliconia latispatha	HELLAT	Heliconiaceae	36.8	39.1	39.1
Heliconia latispatha	HELLAT	Heliconiaceae	37.5	40.5	40.5
Heliconia latispatha	HELLAT	Heliconiaceae	37.7	38.1	38.1
Heliconia latispatha	HELLAT	Heliconiaceae	37.57	37.05	37.05	58.0332	25.5
Heliconia latispatha	HELLAT	Heliconiaceae	36.9	38.42	38.42	98.175	25
Heliconia latispatha	HELLAT	Heliconiaceae	36.53			106.781	23.5
Heliconia librata	HELLIB	Heliconiaceae	19.33
Heliconia librata	HELLIB	Heliconiaceae	18.33
Heliconia librata	HELLIB	Heliconiaceae	20.34
Heliconia librata	HELLIB	Heliconiaceae	19.88
Heliconia librata	HELLIB	Heliconiaceae	20
Heliconia librata	HELLIB	Heliconiaceae	19.42
Heliconia librata	HELLIB	Heliconiaceae	20.49
Heliconia librata	HELLIB	Heliconiaceae	20.6
Heliconia librata	HELLIB	Heliconiaceae	20.91
Heliconia librata	HELLIB	Heliconiaceae	21.49
Heliconia librata	HELLIB	Heliconiaceae	21.31
Heliconia librata	HELLIB	Heliconiaceae	20.57
Heliconia librata	HELLIB	Heliconiaceae	21.15
Heliconia librata	HELLIB	Heliconiaceae	19.34
Heliconia librata	HELLIB	Heliconiaceae	21.15
Heliconia librata	HELLIB	Heliconiaceae	21.75
Heliconia librata	HELLIB	Heliconiaceae	20.11
Heliconia librata	HELLIB	Heliconiaceae	19.95
Heliconia librata	HELLIB	Heliconiaceae	19.35
Heliconia librata	HELLIB	Heliconiaceae	20
Heliconia librata	HELLIB	Heliconiaceae	18.17
Heliconia librata	HELLIB	Heliconiaceae	18.34
Heliconia librata	HELLIB	Heliconiaceae	18.13
Heliconia librata	HELLIB	Heliconiaceae	18.94
Heliconia librata	HELLIB	Heliconiaceae	18.17
Heliconia librata	HELLIB	Heliconiaceae	19.3
Heliconia librata	HELLIB	Heliconiaceae	18.81
Heliconia librata	HELLIB	Heliconiaceae	18.9
Heliconia librata	HELLIB	Heliconiaceae	19
Heliconia librata	HELLIB	Heliconiaceae	18.81
Heliconia librata	HELLIB	Heliconiaceae	18.72
Heliconia librata	HELLIB	Heliconiaceae	18.24
Heliconia librata	HELLIB	Heliconiaceae	18.42
Heliconia librata	HELLIB	Heliconiaceae	18.43
Heliconia librata	HELLIB	Heliconiaceae	18.35
Heliconia librata	HELLIB	Heliconiaceae	18.15
Heliconia librata	HELLIB	Heliconiaceae	17.6
Heliconia librata	HELLIB	Heliconiaceae	19.2
Heliconia librata	HELLIB	Heliconiaceae	18.97
Heliconia librata	HELLIB	Heliconiaceae	18.85
Heliconia librata	HELLIB	Heliconiaceae	18.65
Heliconia librata	HELLIB	Heliconiaceae	18.86
Heliconia librata	HELLIB	Heliconiaceae	18.98
Heliconia librata	HELLIB	Heliconiaceae	18.95	22.19	22.19	16.5523	22.5
Heliconia librata	HELLIB	Heliconiaceae	19.21	21.9	21.9	25.5255	25.5
Heliconia librata	HELLIB	Heliconiaceae	19.07	20.97	20.97
Heliconia librata	HELLIB	Heliconiaceae	20.68	21.42	21.42
Heliconia librata	HELLIB	Heliconiaceae	20.47	22.09	22.09
Heliconia librata	HELLIB	Heliconiaceae	19.19	20.71	20.71
Heliconia librata	HELLIB	Heliconiaceae	18.82	20.7	20.7	9.22845	23.5
Heliconia librata	HELLIB	Heliconiaceae	19.66	21.06	21.06
Heliconia librata	HELLIB	Heliconiaceae	17.86	19.75	19.75	14.1372	23.5
Heliconia librata	HELLIB	Heliconiaceae	18.92	19.52	19.52
Heliconia librata	HELLIB	Heliconiaceae	20	22.21	22.21	45.1605	27
Heliconia librata	HELLIB	Heliconiaceae	18.35	21.6	21.6	15.3605	26
Heliconia librata	HELLIB	Heliconiaceae	17.14	20.03	20.03
Heliconia librata	HELLIB	Heliconiaceae	19.25	22.11	22.11
Heliconia librata	HELLIB	Heliconiaceae	18.41			29.7038	24
Heliconia librata	HELLIB	Heliconiaceae	19.05	20.92	20.92	29.7215	26.5
Heliconia librata	HELLIB	Heliconiaceae	18.06	21	21
Heliconia librata	HELLIB	Heliconiaceae	18.71	21.4	21.4
Heliconia librata	HELLIB	Heliconiaceae	17.8	20	20	14.9226	22
Heliconia librata	HELLIB	Heliconiaceae	18.1	21.5	21.5
Heliconia librata	HELLIB	Heliconiaceae	18.5	20.9	20.9	22.5802	23
Heliconia librata	HELLIB	Heliconiaceae	18.3	20.4	20.4
Heliconia librata	HELLIB	Heliconiaceae	19.5	21.4	21.4	13.9408	18
Heliconia librata	HELLIB	Heliconiaceae	18.61	20.84	20.84	30.1358	26
Heliconia librata	HELLIB	Heliconiaceae	23.09	24.94	24.94
Heliconia librata	HELLIB	Heliconiaceae	16.91	20.56	20.56	24.5437	26.5
Heliconia librata	HELLIB	Heliconiaceae	17			11.192	25
Heliconia librata	HELLIB	Heliconiaceae	21.82	24.23	24.23	14.8362	24
Heliconia librata	HELLIB	Heliconiaceae				18.5747	25
Heliconia librata	HELLIB	Heliconiaceae				27.1297	24.5
Heliconia librata	HELLIB	Heliconiaceae
Heliconia librata	HELLIB	Heliconiaceae				10.7993	27
Heliconia librata	HELLIB	Heliconiaceae				27.3162	22
Heliconia librata	HELLIB	Heliconiaceae				20.4204	25.5
Heliconia librata	HELLIB	Heliconiaceae				32.3978	24
Heliconia librata	HELLIB	Heliconiaceae
Heliconia wagneriana	HELWAG	Heliconiaceae	60.83
Heliconia wagneriana	HELWAG	Heliconiaceae	62.47
Heliconia wagneriana	HELWAG	Heliconiaceae	61.8
Heliconia wagneriana	HELWAG	Heliconiaceae	60.85
Heliconia wagneriana	HELWAG	Heliconiaceae	58.88
Heliconia wagneriana	HELWAG	Heliconiaceae	59.92
Heliconia wagneriana	HELWAG	Heliconiaceae	61.56
Heliconia wagneriana	HELWAG	Heliconiaceae	58.51
Heliconia wagneriana	HELWAG	Heliconiaceae	62.74
Heliconia wagneriana	HELWAG	Heliconiaceae	58.68
Heliconia wagneriana	HELWAG	Heliconiaceae	57.5
Heliconia wagneriana	HELWAG	Heliconiaceae	58.06
Heliconia wagneriana	HELWAG	Heliconiaceae	58.19
Heliconia wagneriana	HELWAG	Heliconiaceae	57.55
Heliconia wagneriana	HELWAG	Heliconiaceae	58.63
Heliconia wagneriana	HELWAG	Heliconiaceae	58.75
Heliconia wagneriana	HELWAG	Heliconiaceae	58.04
Heliconia wagneriana	HELWAG	Heliconiaceae
Heliconia wagneriana	HELWAG	Heliconiaceae	59.46
Heliconia wagneriana	HELWAG	Heliconiaceae	59.5
Heliconia wagneriana	HELWAG	Heliconiaceae	59.2
Heliconia wagneriana	HELWAG	Heliconiaceae	61.58
Heliconia wagneriana	HELWAG	Heliconiaceae	62
Heliconia wagneriana	HELWAG	Heliconiaceae	62.51
Heliconia wagneriana	HELWAG	Heliconiaceae	61.45
Heliconia wagneriana	HELWAG	Heliconiaceae	62.26
Heliconia wagneriana	HELWAG	Heliconiaceae	63.44
Heliconia wagneriana	HELWAG	Heliconiaceae	61.98
Heliconia wagneriana	HELWAG	Heliconiaceae	63.3
Heliconia wagneriana	HELWAG	Heliconiaceae	64.58
Heliconia wagneriana	HELWAG	Heliconiaceae	60.38
Heliconia wagneriana	HELWAG	Heliconiaceae	62.9
Heliconia wagneriana	HELWAG	Heliconiaceae	63.76
Heliconia wagneriana	HELWAG	Heliconiaceae	62.78
Heliconia wagneriana	HELWAG	Heliconiaceae	60.28
Heliconia wagneriana	HELWAG	Heliconiaceae	63.06
Heliconia wagneriana	HELWAG	Heliconiaceae	61.89
Heliconia wagneriana	HELWAG	Heliconiaceae	61.98
Heliconia wagneriana	HELWAG	Heliconiaceae	62.39
Heliconia wagneriana	HELWAG	Heliconiaceae	63.59
Heliconia wagneriana	HELWAG	Heliconiaceae				39.9317	26
Heliconia wagneriana	HELWAG	Heliconiaceae	63.02	68.7	68.7	19.8314	16
Heliconia wagneriana	HELWAG	Heliconiaceae	65.87	70.62	70.62	32.4527	16
Heliconia wagneriana	HELWAG	Heliconiaceae	65.62	68	68	31.1038	20
Heliconia wagneriana	HELWAG	Heliconiaceae	65.52	67.39	67.39	55.7438	25
Heliconia wagneriana	HELWAG	Heliconiaceae	64.17	67.02	67.02	32.3742	17.5
Heliconia wagneriana	HELWAG	Heliconiaceae	64.76	67.61	67.61	29.8452	21
Heliconia wagneriana	HELWAG	Heliconiaceae	63.11	65.2	65.2	31.2	25
Heliconia wagneriana	HELWAG	Heliconiaceae	62.66	65.84	65.84	36.7174	20
Heliconia wagneriana	HELWAG	Heliconiaceae	64.54	66.86	66.86	29.3543	12
Heliconia wagneriana	HELWAG	Heliconiaceae	62.77	65.1	65.1	22.7766	12.5
Heliconia wagneriana	HELWAG	Heliconiaceae	65.1	66.52	66.52	49.0875	30
Heliconia wagneriana	HELWAG	Heliconiaceae	61.59	63.52	63.52	10.0217	18.5
Heliconia wagneriana	HELWAG	Heliconiaceae	62.78	65.05	65.05	11.8615
Heliconia wagneriana	HELWAG	Heliconiaceae	65.05	68.24	68.24	18.7416
Heliconia wagneriana	HELWAG	Heliconiaceae	62.2	63.8	63.8	38.893	28
Heliconia wagneriana	HELWAG	Heliconiaceae	61.05	65.04	65.04	31.1058	27.5
Heliconia wagneriana	HELWAG	Heliconiaceae	63.39	68.3	68.3	28.5886	27
Heliconia wagneriana	HELWAG	Heliconiaceae	63.27	69.1	69.1	27.489	26
Heliconia wagneriana	HELWAG	Heliconiaceae	61.38	65.09	65.09	4.45518	25
Heliconia wagneriana	HELWAG	Heliconiaceae	62.1	63.92	63.92	31.2786	28
Heliconia wagneriana	HELWAG	Heliconiaceae	63.92	70.01	70.01	70.686	27
Heliconia wagneriana	HELWAG	Heliconiaceae	60.45	64.17	64.17	25.1053	28.5
Heliconia wagneriana	HELWAG	Heliconiaceae				24.7421	22
Heliconia wagneriana	HELWAG	Heliconiaceae	60.15	64.35	64.35	10.5518	19.5
Heliconia wagneriana	HELWAG	Heliconiaceae	59.54			21.5985	28
Heliconia wagneriana	HELWAG	Heliconiaceae	64.31	69.46	69.46	31.3276	19
Heliconia wagneriana	HELWAG	Heliconiaceae	63.27	65.86	65.86	51.051	26.5
Heliconia wagneriana	HELWAG	Heliconiaceae	57.65	62.14	62.14	4.88911
Heliconia wagneriana	HELWAG	Heliconiaceae	62.14	66.18	66.18	21.5985	29.5
Heliconia wagneriana	HELWAG	Heliconiaceae	63.09	67.73	67.73	45.1605	29
Heliconia wagneriana	HELWAG	Heliconiaceae	61.6	66.79	66.79
Heliconia wagneriana	HELWAG	Heliconiaceae	61.21	63.82	63.82	19.635	28
Heliconia wagneriana	HELWAG	Heliconiaceae	64.5	69.24	69.24	28.4707	21
Heliconia wagneriana	HELWAG	Heliconiaceae	63.68	70.4	70.4	47.5167	27.5
Heliconia wagneriana	HELWAG	Heliconiaceae	65.54	68.46	68.46
Heliconia wagneriana	HELWAG	Heliconiaceae	64.28	69.51	69.51
Heliconia wagneriana	HELWAG	Heliconiaceae	61.39	63.57	63.57
Heliconia wagneriana	HELWAG	Heliconiaceae	65.49	66.56	66.56
Heliconia wagneriana	HELWAG	Heliconiaceae	62.23	67.09	67.09	28.0781	25
Heliconia wagneriana	HELWAG	Heliconiaceae	63.56	68.92	68.92	24.8265	20
Heliconia wagneriana	HELWAG	Heliconiaceae	64.38	69.23	69.23	28.4707	25
Heliconia wagneriana	HELWAG	Heliconiaceae	62.24	67.36	67.36
Heliconia wagneriana	HELWAG	Heliconiaceae	59.58	63.09	63.09	20.6167	27
Heliconia wagneriana	HELWAG	Heliconiaceae	60.33	66.2	66.2	56.5488	28.5
Heliconia wagneriana	HELWAG	Heliconiaceae	61.74	59.72	59.72
Heliconia wagneriana	HELWAG	Heliconiaceae	64.76	68.38	68.38
Heliconia wagneriana	HELWAG	Heliconiaceae	62.29	65.78	65.78	17.9307	21.5
Heliconia wagneriana	HELWAG	Heliconiaceae	60.41	63.57	63.57	36.2796	25.5
Heliconia wagneriana	HELWAG	Heliconiaceae	61.71	65.69	65.69	13.4107	27.5
Heliconia wagneriana	HELWAG	Heliconiaceae	63.74	69.75	69.75	36.798	25.5
Heliconia wagneriana	HELWAG	Heliconiaceae	62.07	64.18	64.18	30.4342	31
Heliconia wagneriana	HELWAG	Heliconiaceae	62.76	65.65	65.65	30.4657	28.5
Heliconia wagneriana	HELWAG	Heliconiaceae	62.63	66.97	66.97	15.6707	29
Heliconia wagneriana	HELWAG	Heliconiaceae	61.79	66.25	66.25	31.6065	21
Heliconia wagneriana	HELWAG	Heliconiaceae	61.6	62.59	62.59	31.1607	28.5
Heliconia wagneriana	HELWAG	Heliconiaceae	63.45	67	67	12.1776	19.5
Heliconia wagneriana	HELWAG	Heliconiaceae	64.38	66.1	66.1
Heliconia wagneriana	HELWAG	Heliconiaceae	64.14	67.09	67.09	19.3915	16.5
Heliconia wagneriana	HELWAG	Heliconiaceae	61.78	64.6	64.6
Heliconia wagneriana	HELWAG	Heliconiaceae	65.14	65.14	65.14	39.1149	29.5
Heliconia wagneriana	HELWAG	Heliconiaceae				20.44	23.5
Justicia aurantiaca	JUSAUR	Acanthaceae	62.02	56.22	61.59
Justicia aurantiaca	JUSAUR	Acanthaceae	60.94	57.28	60.42
Justicia aurantiaca	JUSAUR	Acanthaceae	57.55	52.21	57.98
Justicia aurantiaca	JUSAUR	Acanthaceae	59.41	54.37	59.22
Justicia aurantiaca	JUSAUR	Acanthaceae	61.21	54.13	60.84
Justicia aurantiaca	JUSAUR	Acanthaceae	62.3	56.86	61.26
Justicia aurantiaca	JUSAUR	Acanthaceae	60.54	54.56	59.7
Justicia aurantiaca	JUSAUR	Acanthaceae	62.87	56.82	61.81
Justicia aurantiaca	JUSAUR	Acanthaceae	64.45	57.85	62.57
Justicia aurantiaca	JUSAUR	Acanthaceae	64.02	58.38	61.57
Justicia aurantiaca	JUSAUR	Acanthaceae	64.14	59.2	62.26
Justicia aurantiaca	JUSAUR	Acanthaceae	63.05	57.37	59.7
Justicia aurantiaca	JUSAUR	Acanthaceae	64.05	59.8	61.52
Justicia aurantiaca	JUSAUR	Acanthaceae	64.38	58.6	62.72
Justicia aurantiaca	JUSAUR	Acanthaceae	61.92	58.49	61.87
Justicia aurantiaca	JUSAUR	Acanthaceae	61.92	58.49	61.87
Justicia aurantiaca	JUSAUR	Acanthaceae	61.5	57.12	58.47
Justicia aurantiaca	JUSAUR	Acanthaceae	59.87	52.91	57.06	9.84892	18.5
Justicia aurantiaca	JUSAUR	Acanthaceae	58.9	53.73	57.58	1.74162	16.5
Justicia aurantiaca	JUSAUR	Acanthaceae	64.6	57.72	61.42
Justicia aurantiaca	JUSAUR	Acanthaceae	63.56	55.72	60.08
Justicia aurantiaca	JUSAUR	Acanthaceae	64.67	56.57	61.05
Justicia aurantiaca	JUSAUR	Acanthaceae	65.14	57.13	62
Justicia aurantiaca	JUSAUR	Acanthaceae	64.1	57.27	62.18
Justicia aurantiaca	JUSAUR	Acanthaceae	63.52	56.95	59.4
Justicia aurantiaca	JUSAUR	Acanthaceae	67.25	59.44	62.42
Justicia aurantiaca	JUSAUR	Acanthaceae	64.77	54.89	57.67
Justicia aurantiaca	JUSAUR	Acanthaceae	68.3	55.38	63.71
Justicia aurantiaca	JUSAUR	Acanthaceae	61.08	53.52	57.76
Justicia aurantiaca	JUSAUR	Acanthaceae	66.24	56.81	63.59	0.914991	15
Justicia aurantiaca	JUSAUR	Acanthaceae	68.04	NA	63.16
Justicia aurantiaca	JUSAUR	Acanthaceae	69.57	NA		1.91049	20.5
Justicia aurantiaca	JUSAUR	Acanthaceae	63.67	NA	59.46	3.47147	21
Justicia aurantiaca	JUSAUR	Acanthaceae	65.87	NA	65.18	7.07645	22
Justicia aurantiaca	JUSAUR	Acanthaceae	66.91	NA
Justicia aurantiaca	JUSAUR	Acanthaceae	64.5	NA	61.41	0.642065
Justicia aurantiaca	JUSAUR	Acanthaceae	68.54	59.6	63.36	5.8905	21.5
Justicia aurantiaca	JUSAUR	Acanthaceae	65	NA
Justicia aurantiaca	JUSAUR	Acanthaceae	63.86	NA	58.02	11.3569	21
Justicia aurantiaca	JUSAUR	Acanthaceae	67.49	NA
Justicia aurantiaca	JUSAUR	Acanthaceae	65.11	NA	61.73	15.3251	21
Justicia aurantiaca	JUSAUR	Acanthaceae		NA	62.57
Justicia aurantiaca	JUSAUR	Acanthaceae	67.22	57.83	61.92
Justicia aurantiaca	JUSAUR	Acanthaceae	64.18	53.57	59.57
Justicia aurantiaca	JUSAUR	Acanthaceae	65.36	59.52	59.52	8.38415	21
Justicia aurantiaca	JUSAUR	Acanthaceae	65.06	61.4	61.4
Justicia aurantiaca	JUSAUR	Acanthaceae	65.44	53.3	61.55	4.90875	16.5
Justicia aurantiaca	JUSAUR	Acanthaceae	67.72	56.11	62.15	12.8315	21
Justicia aurantiaca	JUSAUR	Acanthaceae	65.64	53.92	60.4	9.85284	21.5
Justicia aurantiaca	JUSAUR	Acanthaceae	68.43	55.6	62.37
Justicia aurantiaca	JUSAUR	Acanthaceae	66.13	56.6	63.16	7.70674	20
Justicia aurantiaca	JUSAUR	Acanthaceae	64.41	54	59.72	2.83726	20.5
Justicia aurantiaca	JUSAUR	Acanthaceae	65.97	62.91	56.47	9.83124	21
Justicia aurantiaca	JUSAUR	Acanthaceae	70	57.5	63.1
Justicia aurantiaca	JUSAUR	Acanthaceae	65.9	56.3	62.2
Justicia aurantiaca	JUSAUR	Acanthaceae	71.05	59.4	63.8
Justicia aurantiaca	JUSAUR	Acanthaceae	68.15	56.5	62.05
Justicia aurantiaca	JUSAUR	Acanthaceae	69.5	59.1	65.03
Justicia aurantiaca	JUSAUR	Acanthaceae	69.9	59.08	66
Justicia aurantiaca	JUSAUR	Acanthaceae	69.5	58.05	63.02
Justicia aurantiaca	JUSAUR	Acanthaceae	68.5	58.2	62.15	20.6167	20.5
Justicia aurantiaca	JUSAUR	Acanthaceae	69	58.1	62.9	9.22845	20
Justicia aurantiaca	JUSAUR	Acanthaceae	68.5	57.5	62.95	19.635	21
Justicia aurantiaca	JUSAUR	Acanthaceae	68	56.25	62.75	19.046	21.5
Justicia aurantiaca	JUSAUR	Acanthaceae	68.9	57.05	63.4
Justicia aurantiaca	JUSAUR	Acanthaceae	71.5	60.02	66.05
Justicia aurantiaca	JUSAUR	Acanthaceae	71	61.15	66.9
Justicia aurantiaca	JUSAUR	Acanthaceae	71.9	62.5	66.07
Justicia aurantiaca	JUSAUR	Acanthaceae	72.15	61.5	66.53
Justicia aurantiaca	JUSAUR	Acanthaceae	72	61.4	67.02
Justicia aurantiaca	JUSAUR	Acanthaceae	71.95	64.2	68.53	11.192	18.5
Justicia aurantiaca	JUSAUR	Acanthaceae	73.1	63.3	69.91	5.1051	17
Justicia aurantiaca	JUSAUR	Acanthaceae	73.05	62.3	68.2	6.91152	17.5
Justicia aurantiaca	JUSAUR	Acanthaceae
Justicia aurantiaca	JUSAUR	Acanthaceae	73.7	64.1	68.2
Justicia aurantiaca	JUSAUR	Acanthaceae	70.62	58.76	62.93	16.0359	21
Justicia aurantiaca	JUSAUR	Acanthaceae	71.85	60.2	64.73	20.0788	21.5
Justicia aurantiaca	JUSAUR	Acanthaceae	71.14	61.14	64.27	19.3208	22
Justicia aurantiaca	JUSAUR	Acanthaceae	70.14	60.58	64.11	13.6267	20.5
Justicia aurantiaca	JUSAUR	Acanthaceae	69.22	60.07	63.69	18.2016	22
Justicia aurantiaca	JUSAUR	Acanthaceae	71.3	60.75	64.98	18.6807	20.5
Justicia aurantiaca	JUSAUR	Acanthaceae	70.01	59.37	64.9	18.3587	22
Justicia aurantiaca	JUSAUR	Acanthaceae	70.02	59.62	63.69	10.0335	23
Justicia aurantiaca	JUSAUR	Acanthaceae	66.65	56	61.19	3.60891	22
Justicia aurantiaca	JUSAUR	Acanthaceae	72.29	60.19	65.07	6.51489	18
Justicia aurantiaca	JUSAUR	Acanthaceae	72.34	61.7	66.26	8.7199	18.5
Justicia aurantiaca	JUSAUR	Acanthaceae	72.22	62.62	65.45	10.7993	17.5
Justicia aurantiaca	JUSAUR	Acanthaceae	71.5	61.95	65.09	7.21586	18.5
Justicia aurantiaca	JUSAUR	Acanthaceae	69.66	58.88	63.86	20.656	22
Justicia aurantiaca	JUSAUR	Acanthaceae	69.18	59.72	61.36	17.7461	21.5
Justicia aurantiaca	JUSAUR	Acanthaceae	69.55	60.53	63.12	15.2564	21
Justicia aurantiaca	JUSAUR	Acanthaceae	70.23	58.92	63.41	17.161	21
Justicia aurantiaca	JUSAUR	Acanthaceae	66.83	56.31	59.72	12.5134	21.5
Justicia aurantiaca	JUSAUR	Acanthaceae	63.41	53.08	56.69	10.0904	20.5
Justicia aurantiaca	JUSAUR	Acanthaceae	63.06	52.27	56.3	12.0068	21
Justicia aurantiaca	JUSAUR	Acanthaceae	61.62	51.51	56.33	10.1199	21.5
Justicia aurantiaca	JUSAUR	Acanthaceae	69.16	59.24	62.45	9.82339	20
Justicia aurantiaca	JUSAUR	Acanthaceae	63.92	52.7	56.65
Malvaviscus arboreus	MALARB	Malvaceae	42.18	63.73	58.4635
Malvaviscus arboreus	MALARB	Malvaceae	42.85	66.08	60.8135
Malvaviscus arboreus	MALARB	Malvaceae	40.57	64.72	59.4535
Malvaviscus arboreus	MALARB	Malvaceae	43.9	64.34	59.0735
Malvaviscus arboreus	MALARB	Malvaceae	40.26	66.55	61.2835
Malvaviscus arboreus	MALARB	Malvaceae		63.04	57.7735
Malvaviscus arboreus	MALARB	Malvaceae	40.12	67.16	61.8935
Malvaviscus arboreus	MALARB	Malvaceae
Malvaviscus arboreus	MALARB	Malvaceae	42.07	62.87	57.6035
Malvaviscus arboreus	MALARB	Malvaceae	42.5	63.44	58.1735
Malvaviscus arboreus	MALARB	Malvaceae	44.53	65.02	59.7535
Malvaviscus arboreus	MALARB	Malvaceae	42.31	66.17	60.9035
Malvaviscus arboreus	MALARB	Malvaceae	43.8	63.26	57.9935
Malvaviscus arboreus	MALARB	Malvaceae	42.08	64.09	58.8235
Malvaviscus arboreus	MALARB	Malvaceae	41.43	64.55	59.2835
Malvaviscus arboreus	MALARB	Malvaceae	39.95	62.54	57.2735
Malvaviscus arboreus	MALARB	Malvaceae	39.84	66.02	60.7535
Malvaviscus arboreus	MALARB	Malvaceae	38.71	65.3	60.0335
Malvaviscus arboreus	MALARB	Malvaceae				6.69161	21.5
Malvaviscus arboreus	MALARB	Malvaceae				27.0963	12.5
Malvaviscus arboreus	MALARB	Malvaceae				13.7445	19.5
Malvaviscus arboreus	MALARB	Malvaceae				1.9635	12
Malvaviscus arboreus	MALARB	Malvaceae				9.23827	20.05
Malvaviscus arboreus	MALARB	Malvaceae				24.5437	19.5
Malvaviscus arboreus	MALARB	Malvaceae				20.5009	8
Malvaviscus arboreus	MALARB	Malvaceae				11.9872	18
Malvaviscus arboreus	MALARB	Malvaceae
Malvaviscus arboreus	MALARB	Malvaceae				21.5985
Malvaviscus arboreus	MALARB	Malvaceae	43.58	64.86	58.54
Malvaviscus arboreus	MALARB	Malvaceae	42.75	64.84	59.04
Malvaviscus arboreus	MALARB	Malvaceae	42.82	63.9	56.8
Malvaviscus arboreus	MALARB	Malvaceae	39.25	61.01	58.65
Malvaviscus arboreus	MALARB	Malvaceae	45.85	63.15	58.44
Malvaviscus arboreus	MALARB	Malvaceae	40.69	65.06	61.69
Malvaviscus arboreus	MALARB	Malvaceae	42.64	64.75	58.6
Malvaviscus arboreus	MALARB	Malvaceae	39.24	67.15	60.32
Malvaviscus arboreus	MALARB	Malvaceae	41.86	65.81	58.65
Malvaviscus arboreus	MALARB	Malvaceae	34.6	62.85	59.81
Malvaviscus arboreus	MALARB	Malvaceae	44	64.29	56.87
Malvaviscus arboreus	MALARB	Malvaceae	41.76	62.93	58.23
Malvaviscus arboreus	MALARB	Malvaceae	45.25	64.86	58.04
Malvaviscus arboreus	MALARB	Malvaceae	43.71	66.5	59.95
Malvaviscus arboreus	MALARB	Malvaceae	42.75	65.46	61.25
Malvaviscus arboreus	MALARB	Malvaceae	39.6	64.84	60.3
Malvaviscus arboreus	MALARB	Malvaceae				27.489	21.5
Malvaviscus arboreus	MALARB	Malvaceae	42.94	58.9	56.5
Malvaviscus arboreus	MALARB	Malvaceae
Malvaviscus arboreus	MALARB	Malvaceae
Malvaviscus arboreus	MALARB	Malvaceae	41	57.8	55.7
Malvaviscus arboreus	MALARB	Malvaceae	43.09	61.8	58.5
Malvaviscus arboreus	MALARB	Malvaceae	44.02	61.35	59.35
Malvaviscus arboreus	MALARB	Malvaceae
Malvaviscus arboreus	MALARB	Malvaceae				11.6062	23
Malvaviscus arboreus	MALARB	Malvaceae				16.356	19.5
Malvaviscus arboreus	MALARB	Malvaceae				10.3103	22.5
Malvaviscus arboreus	MALARB	Malvaceae				9.55832	21
Malvaviscus arboreus	MALARB	Malvaceae				11.4472	22
Malvaviscus arboreus	MALARB	Malvaceae				1.81624	22
Malvaviscus arboreus	MALARB	Malvaceae				14.1883	22
Malvaviscus arboreus	MALARB	Malvaceae				17.4751	22
Malvaviscus arboreus	MALARB	Malvaceae
Malvaviscus arboreus	MALARB	Malvaceae				4.3197	21
Malvaviscus arboreus	MALARB	Malvaceae				11.2999	22.5
Malvaviscus arboreus	MALARB	Malvaceae				27.2926	21
Malvaviscus arboreus	MALARB	Malvaceae				8.83575	20
Malvaviscus arboreus	MALARB	Malvaceae				10.9956	19
Malvaviscus arboreus	MALARB	Malvaceae				9.8175	18.5
Malvaviscus arboreus	MALARB	Malvaceae				7.854	20
Malvaviscus arboreus	MALARB	Malvaceae				9.71932	22.5
Malvaviscus arboreus	MALARB	Malvaceae				31.8087	25
Malvaviscus arboreus	MALARB	Malvaceae				11.4865	25
Malvaviscus arboreus	MALARB	Malvaceae				21.5926	24
Malvaviscus arboreus	MALARB	Malvaceae				17.6224	22.5
Malvaviscus arboreus	MALARB	Malvaceae				4.90875	21
Malvaviscus arboreus	MALARB	Malvaceae				15.2034	23
Malvaviscus arboreus	MALARB	Malvaceae				24.5437	20.5
Malvaviscus arboreus	MALARB	Malvaceae				12.2738	21.5
Malvaviscus arboreus	MALARB	Malvaceae				4.92053	21
Malvaviscus arboreus	MALARB	Malvaceae				11.5846	23.5
Malvaviscus arboreus	MALARB	Malvaceae				49.0875	22
Malvaviscus arboreus	MALARB	Malvaceae				24.5437	18
Malvaviscus arboreus	MALARB	Malvaceae				28.4707	21.5
Malvaviscus arboreus	MALARB	Malvaceae				26.5072	21.5
Malvaviscus arboreus	MALARB	Malvaceae				35.343	22
Odontonema callistachyum	ODONCALL	Acanthaceae	16.62	15.21		4.55532	18
Odontonema callistachyum	ODONCALL	Acanthaceae	15.76	15.49	22.05	2.70963	15
Odontonema callistachyum	ODONCALL	Acanthaceae	16.43	15.73	23.78	2.22072	17
Odontonema callistachyum	ODONCALL	Acanthaceae	15.72	14.72	21.2	3.08269	15
Odontonema callistachyum	ODONCALL	Acanthaceae	16.87	15.92	22.68
Odontonema callistachyum	ODONCALL	Acanthaceae	17.12	15.69
Odontonema callistachyum	ODONCALL	Acanthaceae	16.9	15.7	26.09
Odontonema callistachyum	ODONCALL	Acanthaceae	16.62	15.85	22.1	4.3413	17
Odontonema callistachyum	ODONCALL	Acanthaceae	17.42	14.92	22.86
Odontonema callistachyum	ODONCALL	Acanthaceae	16.83	15.82	22.17
Odontonema callistachyum	ODONCALL	Acanthaceae	16.46	15.86	22.17
Odontonema callistachyum	ODONCALL	Acanthaceae	15.66	14.6	22.36
Odontonema callistachyum	ODONCALL	Acanthaceae	15.36	15.23	22.43
Odontonema callistachyum	ODONCALL	Acanthaceae	16.05	15.04	24.39
Odontonema callistachyum	ODONCALL	Acanthaceae	15.63	15.3	21.9
Odontonema callistachyum	ODONCALL	Acanthaceae	16.7	15.7	20.4
Odontonema callistachyum	ODONCALL	Acanthaceae	16.76	15.46	21.44
Odontonema callistachyum	ODONCALL	Acanthaceae	16.62	15.21	22.15	4.08408	18
Odontonema callistachyum	ODONCALL	Acanthaceae	15.6	14.37	22.3	3.85631	18
Odontonema callistachyum	ODONCALL	Acanthaceae	16.92	15.84	24.28	6.74266	17.5
Odontonema callistachyum	ODONCALL	Acanthaceae			22.7	4.67509	17
Odontonema callistachyum	ODONCALL	Acanthaceae	16.11	15.8	20.86	2.7057	17.5
Odontonema callistachyum	ODONCALL	Acanthaceae	16.87	15.89	20.4	2.68607	17.5
Odontonema callistachyum	ODONCALL	Acanthaceae	16.49	15.5	24.96	4.58281	19
Odontonema callistachyum	ODONCALL	Acanthaceae	16.06	13.84	24.21
Odontonema callistachyum	ODONCALL	Acanthaceae	15.37	14.73	19.56
Odontonema callistachyum	ODONCALL	Acanthaceae	15.6	13.46	19.68
Odontonema callistachyum	ODONCALL	Acanthaceae	14.83	13.58	22
Odontonema callistachyum	ODONCALL	Acanthaceae	14.7	14.62	20.98
Odontonema tubeaforme	ODONTUB	Acanthaceae	22.04	30.67	20.05
Odontonema tubeaforme	ODONTUB	Acanthaceae
Odontonema tubeaforme	ODONTUB	Acanthaceae
Odontonema tubeaforme	ODONTUB	Acanthaceae	20.66	27.86	19.61
Odontonema tubeaforme	ODONTUB	Acanthaceae	20.37	28.29	17.63
Odontonema tubeaforme	ODONTUB	Acanthaceae	20.64	27.74	17.5
Odontonema tubeaforme	ODONTUB	Acanthaceae	20.73	29.33	20.14	4.12335	18
Odontonema tubeaforme	ODONTUB	Acanthaceae				5.11688	17
Odontonema tubeaforme	ODONTUB	Acanthaceae	22.12	30.59
Odontonema tubeaforme	ODONTUB	Acanthaceae	21.05	29.15
Odontonema tubeaforme	ODONTUB	Acanthaceae	22.92	29.68
Odontonema tubeaforme	ODONTUB	Acanthaceae	21.56	28.2	19.41
Odontonema tubeaforme	ODONTUB	Acanthaceae	20.49	29.14	15.53
Odontonema tubeaforme	ODONTUB	Acanthaceae	20.53	27.29	16.32
Odontonema tubeaforme	ODONTUB	Acanthaceae	23.3	28.4	17.08
Odontonema tubeaforme	ODONTUB	Acanthaceae	22.05	31.8	17.1	7.854	20
Odontonema tubeaforme	ODONTUB	Acanthaceae	24.04	27.86	13.44	1.60025	20
Odontonema tubeaforme	ODONTUB	Acanthaceae	21.15	27.88	17.6
Odontonema tubeaforme	ODONTUB	Acanthaceae	19.56	29.72	19.72	2.09898	21
Odontonema tubeaforme	ODONTUB	Acanthaceae	20.08	30.34	16.95	1.75537	20
Odontonema tubeaforme	ODONTUB	Acanthaceae	23.01	28.29	18.07	2.53488	20
Odontonema tubeaforme	ODONTUB	Acanthaceae	20.45	28.65	16.46	10.5322	21
Odontonema tubeaforme	ODONTUB	Acanthaceae	22.24	28.57	16.9	2.82744	24.5
Odontonema tubeaforme	ODONTUB	Acanthaceae	21	28.4	16.05
Odontonema tubeaforme	ODONTUB	Acanthaceae	21.21	28.49	16.3	1.34303	20.5
Odontonema tubeaforme	ODONTUB	Acanthaceae	24.37	30.63	18.27	2.4367	22
Odontonema tubeaforme	ODONTUB	Acanthaceae	23.14	28.97	18.41	4.93035	20
Odontonema tubeaforme	ODONTUB	Acanthaceae	24.01	30.35	17.2	5.07172	19
Odontonema tubeaforme	ODONTUB	Acanthaceae	20.64	27.15	16.2	1.65719	20.5
Odontonema tubeaforme	ODONTUB	Acanthaceae	24.05	30.44	17.79
Odontonema tubeaforme	ODONTUB	Acanthaceae	23.09	30.42	18.4	3.49503	19.5
Odontonema tubeaforme	ODONTUB	Acanthaceae	22.08	28.36	15.97	2.62127	17
Odontonema tubeaforme	ODONTUB	Acanthaceae	22.55	29.07	17.6	5.62739	19.5
Odontonema tubeaforme	ODONTUB	Acanthaceae	21.19	28.6	16.16	2.45241	21
Odontonema tubeaforme	ODONTUB	Acanthaceae	20.53	27.75	16.61
Odontonema tubeaforme	ODONTUB	Acanthaceae	19.91	28.28	17.29	0.846268	22
Odontonema tubeaforme	ODONTUB	Acanthaceae	22.05	29.7	17.24	9.8175	19
Odontonema tubeaforme	ODONTUB	Acanthaceae	20.2	27.45	15.74	1.66701	19
Odontonema tubeaforme	ODONTUB	Acanthaceae	18.6	27.23	18.31	6.47955	20
Odontonema tubeaforme	ODONTUB	Acanthaceae	20.16	27.22	16.7	2.59967	17.5
Odontonema tubeaforme	ODONTUB	Acanthaceae	20.67	26.34	15.61	1.85158	19
Odontonema tubeaforme	ODONTUB	Acanthaceae	21.27	27.21	16.77	3.42434	17.5
Palicourea triphylla	PALTRI	Rubiaceae	15.26
Palicourea triphylla	PALTRI	Rubiaceae	13
Palicourea triphylla	PALTRI	Rubiaceae
Palicourea triphylla	PALTRI	Rubiaceae	16.7
Palicourea triphylla	PALTRI	Rubiaceae	12.4
Palicourea triphylla	PALTRI	Rubiaceae	15.24
Palicourea triphylla	PALTRI	Rubiaceae	16.33
Palicourea triphylla	PALTRI	Rubiaceae	12.14
Palicourea triphylla	PALTRI	Rubiaceae	15.35
Palicourea triphylla	PALTRI	Rubiaceae	15.97
Palicourea triphylla	PALTRI	Rubiaceae	16.72
Palicourea triphylla	PALTRI	Rubiaceae	16.19
Palicourea triphylla	PALTRI	Rubiaceae	15.73
Palicourea triphylla	PALTRI	Rubiaceae	16.12
Palicourea triphylla	PALTRI	Rubiaceae	12.82
Palicourea triphylla	PALTRI	Rubiaceae	15.52
Palicourea triphylla	PALTRI	Rubiaceae	16.4
Palicourea triphylla	PALTRI	Rubiaceae
Palicourea triphylla	PALTRI	Rubiaceae
Palicourea triphylla	PALTRI	Rubiaceae	16.78	7.81	13.05
Palicourea triphylla	PALTRI	Rubiaceae	16.29	8.54	14.42
Palicourea triphylla	PALTRI	Rubiaceae	16.9	8.16	14.8
Palicourea triphylla	PALTRI	Rubiaceae	15.96	13.02	7.55
Palicourea triphylla	PALTRI	Rubiaceae	16.21	14.17	9.51	8.17798	22
Palicourea triphylla	PALTRI	Rubiaceae	16.82	14.22	7.58	6.3048	22
Palicourea triphylla	PALTRI	Rubiaceae	16.24	14.6	7.2	7.95217	19
Palicourea triphylla	PALTRI	Rubiaceae	16.15	14.3	7.5	6.62092	22
Palicourea triphylla	PALTRI	Rubiaceae	16.22	14.37	8.48	7.88934	21
Palicourea triphylla	PALTRI	Rubiaceae	16.18	14.86	8.9	9.01836	21.5
Palicourea triphylla	PALTRI	Rubiaceae		13.16	8.15	7.50057	21
Palicourea triphylla	PALTRI	Rubiaceae	15.25	13.29	8.24
Palicourea triphylla	PALTRI	Rubiaceae	17.96
Palicourea triphylla	PALTRI	Rubiaceae	17	14.8	9.3
Palicourea triphylla	PALTRI	Rubiaceae	15.72	13.68	6.3
Palicourea triphylla	PALTRI	Rubiaceae	14.76	13.1	6.5
Palicourea triphylla	PALTRI	Rubiaceae	14.64	12.74	6.17
Psychotria poeppigiana	PSYPOE	Rubiaceae	16.7061
Psychotria poeppigiana	PSYPOE	Rubiaceae	16.8459
Psychotria poeppigiana	PSYPOE	Rubiaceae	16.1003
Psychotria poeppigiana	PSYPOE	Rubiaceae	16.1236
Psychotria poeppigiana	PSYPOE	Rubiaceae	16.0304
Psychotria poeppigiana	PSYPOE	Rubiaceae	16.077
Psychotria poeppigiana	PSYPOE	Rubiaceae	19.2458
Psychotria poeppigiana	PSYPOE	Rubiaceae	18.0575
Psychotria poeppigiana	PSYPOE	Rubiaceae	19.6885
Psychotria poeppigiana	PSYPOE	Rubiaceae	15.5644
Psychotria poeppigiana	PSYPOE	Rubiaceae	16.6828
Psychotria poeppigiana	PSYPOE	Rubiaceae	16.8692
Psychotria poeppigiana	PSYPOE	Rubiaceae	16.6362
Psychotria poeppigiana	PSYPOE	Rubiaceae	11.4636
Psychotria poeppigiana	PSYPOE	Rubiaceae	16.4265
Psychotria poeppigiana	PSYPOE	Rubiaceae	12.3723
Psychotria poeppigiana	PSYPOE	Rubiaceae	11.9995
Psychotria poeppigiana	PSYPOE	Rubiaceae	14.7256
Psychotria poeppigiana	PSYPOE	Rubiaceae	13.4441
Psychotria poeppigiana	PSYPOE	Rubiaceae	12.815
Psychotria poeppigiana	PSYPOE	Rubiaceae	13.2111
Psychotria poeppigiana	PSYPOE	Rubiaceae	13.048
Psychotria poeppigiana	PSYPOE	Rubiaceae	13.281
Psychotria poeppigiana	PSYPOE	Rubiaceae	13.5606
Psychotria poeppigiana	PSYPOE	Rubiaceae	13.6305
Psychotria poeppigiana	PSYPOE	Rubiaceae	11.6733
Psychotria poeppigiana	PSYPOE	Rubiaceae	10.951
Psychotria poeppigiana	PSYPOE	Rubiaceae	19.572
Psychotria poeppigiana	PSYPOE	Rubiaceae	13.7237
Psychotria poeppigiana	PSYPOE	Rubiaceae	13.747
Psychotria poeppigiana	PSYPOE	Rubiaceae	14.3994
Psychotria poeppigiana	PSYPOE	Rubiaceae	15.611
Psychotria poeppigiana	PSYPOE	Rubiaceae	14.5159
Psychotria poeppigiana	PSYPOE	Rubiaceae	10.6481
Psychotria poeppigiana	PSYPOE	Rubiaceae	13.1179
Psychotria poeppigiana	PSYPOE	Rubiaceae	15.611
Psychotria poeppigiana	PSYPOE	Rubiaceae	15.378
Psychotria poeppigiana	PSYPOE	Rubiaceae	18.407
Psychotria poeppigiana	PSYPOE	Rubiaceae	18.2905
Psychotria poeppigiana	PSYPOE	Rubiaceae	20.1545
Psychotria poeppigiana	PSYPOE	Rubiaceae	20.1079
Psychotria poeppigiana	PSYPOE	Rubiaceae	21.7622
Psychotria poeppigiana	PSYPOE	Rubiaceae	15.5411
Psychotria poeppigiana	PSYPOE	Rubiaceae	14.1431
Psychotria poeppigiana	PSYPOE	Rubiaceae	14.2596
Psychotria poeppigiana	PSYPOE	Rubiaceae	14.7955
Psychotria poeppigiana	PSYPOE	Rubiaceae	16.5663
Psychotria poeppigiana	PSYPOE	Rubiaceae	17.242
Psychotria poeppigiana	PSYPOE	Rubiaceae	19.4788
Psychotria poeppigiana	PSYPOE	Rubiaceae	17.0556
Psychotria poeppigiana	PSYPOE	Rubiaceae	21.0865
Psychotria poeppigiana	PSYPOE	Rubiaceae	16.5197
Psychotria poeppigiana	PSYPOE	Rubiaceae	12.6286
Psychotria poeppigiana	PSYPOE	Rubiaceae	15.9605
Psychotria poeppigiana	PSYPOE	Rubiaceae	18.2672
Psychotria poeppigiana	PSYPOE	Rubiaceae	15.0285
Psychotria poeppigiana	PSYPOE	Rubiaceae	15.0285
Psychotria poeppigiana	PSYPOE	Rubiaceae	18.8031
Psychotria poeppigiana	PSYPOE	Rubiaceae	17.708
Psychotria poeppigiana	PSYPOE	Rubiaceae	15.5411
Psychotria poeppigiana	PSYPOE	Rubiaceae	17.4517
Psychotria poeppigiana	PSYPOE	Rubiaceae	16
Psychotria poeppigiana	PSYPOE	Rubiaceae	15.26
Psychotria poeppigiana	PSYPOE	Rubiaceae	17.5
Psychotria poeppigiana	PSYPOE	Rubiaceae	16.08
Psychotria poeppigiana	PSYPOE	Rubiaceae	14.8
Psychotria poeppigiana	PSYPOE	Rubiaceae	20.5273
Psychotria poeppigiana	PSYPOE	Rubiaceae	16.6129
Psychotria poeppigiana	PSYPOE	Rubiaceae	10.55	10		6.53649	22
Psychotria poeppigiana	PSYPOE	Rubiaceae	14.64	12.27		11.9577	22
Psychotria poeppigiana	PSYPOE	Rubiaceae	13.15	12.46
Psychotria poeppigiana	PSYPOE	Rubiaceae	14.57	13.63
Psychotria poeppigiana	PSYPOE	Rubiaceae	14.56	13.23
Psychotria poeppigiana	PSYPOE	Rubiaceae	14	13		2.44456	24
Psychotria poeppigiana	PSYPOE	Rubiaceae	13.43	12.76		6.26946	23
Psychotria poeppigiana	PSYPOE	Rubiaceae	12.97	11.21		3.10822	22
Psychotria poeppigiana	PSYPOE	Rubiaceae	14.3	13.05		3.08269	21
Psychotria poeppigiana	PSYPOE	Rubiaceae	14.33		17.43
Psychotria poeppigiana	PSYPOE	Rubiaceae	14.47		15.97
Psychotria poeppigiana	PSYPOE	Rubiaceae	13.4		18.72
Psychotria poeppigiana	PSYPOE	Rubiaceae	15.57		18.93	3.82883	30
Psychotria poeppigiana	PSYPOE	Rubiaceae	10
Psychotria poeppigiana	PSYPOE	Rubiaceae	13.1		15.7	4.51605	25
Psychotria poeppigiana	PSYPOE	Rubiaceae	15.84		18.45	3.85631	28
Psychotria poeppigiana	PSYPOE	Rubiaceae	16.8	14.3
Psychotria poeppigiana	PSYPOE	Rubiaceae	14.4	12.08
Psychotria poeppigiana	PSYPOE	Rubiaceae	13.87	12.36
Psychotria poeppigiana	PSYPOE	Rubiaceae	12.91	10.62
Psychotria poeppigiana	PSYPOE	Rubiaceae	13.04	12.2		4.67117	25.5
Psychotria poeppigiana	PSYPOE	Rubiaceae	13.2	12.16		11.1782	20
Psychotria poeppigiana	PSYPOE	Rubiaceae	19.14		20.45
Psychotria poeppigiana	PSYPOE	Rubiaceae	18.31		20.13
Psychotria poeppigiana	PSYPOE	Rubiaceae	13.1	11.5
Psychotria poeppigiana	PSYPOE	Rubiaceae	10.1	11.1		10.3084	28.5
Psychotria poeppigiana	PSYPOE	Rubiaceae	14		16.8	19.635	21
Psychotria poeppigiana	PSYPOE	Rubiaceae	15.2		17.4	11.0349	28.5
Stromanthe macrochlamys	STROMAC	Marantaceae	7.72	7.72	7.72
Stromanthe macrochlamys	STROMAC	Marantaceae	7.8	7.8	7.8
Stromanthe macrochlamys	STROMAC	Marantaceae	7.7	7.7	7.7
Stromanthe macrochlamys	STROMAC	Marantaceae	7.25	7.25	7.25
Stromanthe macrochlamys	STROMAC	Marantaceae	7.87	7.87	7.87
Stromanthe macrochlamys	STROMAC	Marantaceae	7.8	7.8	7.8
Stromanthe macrochlamys	STROMAC	Marantaceae	7.69	7.69	7.69
Stromanthe macrochlamys	STROMAC	Marantaceae	7.9	7.9	7.9
Stromanthe macrochlamys	STROMAC	Marantaceae	7.92	7.92	7.92
Stromanthe macrochlamys	STROMAC	Marantaceae	8.19	8.19	8.19
Stromanthe macrochlamys	STROMAC	Marantaceae	7.84	7.84	7.84
Stromanthe macrochlamys	STROMAC	Marantaceae	8.02	8.02	8.02
Stromanthe macrochlamys	STROMAC	Marantaceae	8.05	8.05	8.05
Stromanthe macrochlamys	STROMAC	Marantaceae	7.64	7.64	7.64
Stromanthe macrochlamys	STROMAC	Marantaceae	7.79	7.79	7.79
Stromanthe macrochlamys	STROMAC	Marantaceae	7.4	7.4	7.4
Stromanthe macrochlamys	STROMAC	Marantaceae	6.3	6.3	6.3	5.0619	24
Stromanthe macrochlamys	STROMAC	Marantaceae				1.92816	24
Stromanthe macrochlamys	STROMAC	Marantaceae	8.1	8.1	8.1	6.34996	25
Stromanthe macrochlamys	STROMAC	Marantaceae	7.95	7.95	7.95	3.84061	23
Stromanthe macrochlamys	STROMAC	Marantaceae	7.9	7.9	7.9	1.72984	24.5
Stromanthe macrochlamys	STROMAC	Marantaceae	8.25	8.25	8.25	2.39547	19.5
Stromanthe macrochlamys	STROMAC	Marantaceae	7.3	7.3	7.3	4.68295	25
Stromanthe macrochlamys	STROMAC	Marantaceae	8.9	8.9	8.9
Stromanthe macrochlamys	STROMAC	Marantaceae	7.72	7.72	7.72
Stromanthe macrochlamys	STROMAC	Marantaceae	7.3	7.3	7.3
Stromanthe macrochlamys	STROMAC	Marantaceae	7.8	7.8	7.8
Stromanthe macrochlamys	STROMAC	Marantaceae	7.37	7.37	7.37
Stromanthe macrochlamys	STROMAC	Marantaceae	7.72	7.72	7.72
Stromanthe macrochlamys	STROMAC	Marantaceae	8.25	8.25	8.25
Stromanthe macrochlamys	STROMAC	Marantaceae	8.94	8.94	8.94
Stromanthe macrochlamys	STROMAC	Marantaceae	7.17	7.17	7.17
Stromanthe macrochlamys	STROMAC	Marantaceae	8.06	8.06	8.06
Stromanthe macrochlamys	STROMAC	Marantaceae	8	8	8
Stromanthe macrochlamys	STROMAC	Marantaceae	8.27	8.27	8.27
Stromanthe macrochlamys	STROMAC	Marantaceae	7.9	7.9	7.9
Stromanthe macrochlamys	STROMAC	Marantaceae	7.93	7.93	7.93	2.21286	26.5
Stromanthe macrochlamys	STROMAC	Marantaceae	7.35	7.35	7.35
Stromanthe macrochlamys	STROMAC	Marantaceae	7.33	7.33	7.33
Stromanthe macrochlamys	STROMAC	Marantaceae	7.21	7.21	7.21
Stromanthe macrochlamys	STROMAC	Marantaceae	7.23	7.23	7.23	3.9486	26
Stromanthe macrochlamys	STROMAC	Marantaceae	7.23	7.23	7.23	3.36544	25
Stromanthe macrochlamys	STROMAC	Marantaceae	7.64	7.64	7.64	3.61677	26.5
Stromanthe macrochlamys	STROMAC	Marantaceae	6.9	6.9	6.9
Stromanthe macrochlamys	STROMAC	Marantaceae	7.84	7.84	7.84
Stromanthe macrochlamys	STROMAC	Marantaceae	7.96	7.96	7.96	1.34303	20
Stromanthe macrochlamys	STROMAC	Marantaceae	6	6	6	3.29672	24
Stromanthe macrochlamys	STROMAC	Marantaceae	8.56	8.56	8.56	3.10822	26
Stromanthe macrochlamys	STROMAC	Marantaceae				4.47285	27
Stromanthe macrochlamys	STROMAC	Marantaceae	7.95	7.95	7.95	4.99514	27
Stromanthe macrochlamys	STROMAC	Marantaceae	7.57	7.57	7.57	5.23469	25
Stromanthe macrochlamys	STROMAC	Marantaceae	7.93	7.93	7.93	4.48463	27
Stromanthe macrochlamys	STROMAC	Marantaceae	8.56	8.56	8.56	3.05521	22
Stromanthe macrochlamys	STROMAC	Marantaceae	7.95	7.95	7.95	3.73261	19.5
Stromanthe macrochlamys	STROMAC	Marantaceae	6.17	6.17	6.17	3.40864	25
Stromanthe macrochlamys	STROMAC	Marantaceae	7.98	7.98	7.98	3.86417	22
Stromanthe macrochlamys	STROMAC	Marantaceae	7.72	7.72	7.72
Stromanthe macrochlamys	STROMAC	Marantaceae	7.8	7.8	7.8
Stromanthe macrochlamys	STROMAC	Marantaceae	7.4	7.4	7.4	2.99826	23
Stromanthe macrochlamys	STROMAC	Marantaceae	7.77	7.77	7.77	5.8905	21
Stromanthe macrochlamys	STROMAC	Marantaceae	7.67	7.67	7.67
Stromanthe macrochlamys	STROMAC	Marantaceae	7.37	7.37	7.37
Stromanthe macrochlamys	STROMAC	Marantaceae	7.4	7.4	7.4
Stromanthe macrochlamys	STROMAC	Marantaceae	6.93	6.93	6.93	4.79094	27
Stromanthe macrochlamys	STROMAC	Marantaceae	6.96	6.96	6.96
Tillandsia bulbosa	TILLBUL	Bromeliaceae	30.45	37.97	43.56
Tillandsia bulbosa	TILLBUL	Bromeliaceae	28.17	32.91	38.77
Tillandsia bulbosa	TILLBUL	Bromeliaceae	32.28	41.46	39.05
Tillandsia bulbosa	TILLBUL	Bromeliaceae	50.6	41.87	34.5
Tillandsia bulbosa	TILLBUL	Bromeliaceae	51.33	45.08	35.92
Tillandsia bulbosa	TILLBUL	Bromeliaceae	43.33	37.87
Tillandsia bulbosa	TILLBUL	Bromeliaceae	32.5	36.5	38
Tillandsia bulbosa	TILLBUL	Bromeliaceae	29	36	39
Tillandsia bulbosa	TILLBUL	Bromeliaceae	30.78	37.8	39.49
Tillandsia pruinosa	TILLPRU	Bromeliaceae	22.81
Tillandsia pruinosa	TILLPRU	Bromeliaceae	19.87
Tillandsia pruinosa	TILLPRU	Bromeliaceae	18.28
Tillandsia pruinosa	TILLPRU	Bromeliaceae	18.97
Tillandsia streptophylla	TILLSTREP	Bromeliaceae	36.8	47.8	47.84
Tillandsia streptophylla	TILLSTREP	Bromeliaceae	37.26	46.35	46.39
Tillandsia streptophylla	TILLSTREP	Bromeliaceae	35.26	43.67	45.72
Tillandsia streptophylla	TILLSTREP	Bromeliaceae	40.32	54.89	56.57	10.1984	23.5
Tillandsia streptophylla	TILLSTREP	Bromeliaceae	39.45	54.2	56.4	9.51119	20
Tillandsia streptophylla	TILLSTREP	Bromeliaceae	40.5	55.05	56.5	4.4866	20.5
Tillandsia streptophylla	TILLSTREP	Bromeliaceae	39.74	50.08	52.05
Tillandsia streptophylla	TILLSTREP	Bromeliaceae	38.5	49.8	51.2
Tillandsia streptophylla	TILLSTREP	Bromeliaceae	35.25	47.2	48.3	8.6394	20.5
Tillandsia streptophylla	TILLSTREP	Bromeliaceae	39.7	50.05	52	2.53292	24.5
Tillandsia streptophylla	TILLSTREP	Bromeliaceae				7.37687	25.5
Tillandsia streptophylla	TILLSTREP	Bromeliaceae	36.06	40.78	44.5	3.04735	23.5
Tillandsia streptophylla	TILLSTREP	Bromeliaceae	40.11	46.31	47.5	4.85966	25
Tillandsia streptophylla	TILLSTREP	Bromeliaceae	42.32	53.7	53.7	2.10487	22.5
Vriesea heliconioides	VRIHEL	Bromeliaceae	33.03	43.63	41.73	2.86082	21
Vriesea heliconioides	VRIHEL	Bromeliaceae	33	44	42	5.98867	26
