# Supplementary material for: Forbidden links, trait matching and modularity in plant-hummingbird networks: Are specialized modules characterized by higher phenotypic floral integration?
Source: PeerJ. 2021 Mar 10;9:e10974. doi: 10.7717/peerj.10974 (PMC7955668; doi:10.7717/peerj.10974)
Supplement: Supplemental Information 2 — Columns indicate the hummingbird species and the different variables measured. Each row represents individual measurements. [file peerj-09-10974-s002.xlsx]

## Sheet: Hoja1
Hummnigbird species	Bill length (mm)	Bill length+1/3 (mm)	Bill curvature (degrees)	Weight (g)
Phaethornis longirostris	41.5	55.3333	36.47
Phaethornis longirostris	38.1	50.8	23.04
Phaethornis longirostris	37.6	50.1333	31.65	5.5
Phaethornis longirostris	42.7	56.9333	31.32	4.9
Phaethornis longirostris	38.5	51.3333	33.2	4
Phaethornis longirostris	40.4	53.8667	37.29	6
Phaethornis longirostris	45.5	60.6667	40.02	5
Phaethornis longirostris	40.3	53.7333	35.35	6.9
Phaethornis longirostris	38.5	51.3333	35.05	6.6
Phaethornis longirostris	41.9	55.8667	34.04	5
Phaethornis longirostris	40.1	53.4667	26.88	4.5
Phaethornis longirostris	41.5	55.3333	26.37	4.8
Phaethornis longirostris	40.2	53.6	27.77	5.3
Phaethornis longirostris	38.6	51.4667	31.13	5.8
Phaethornis longirostris	42.8	57.0667	29.3	6.5
Phaethornis longirostris	41.5	55.3333	30.86	6.2
Phaethornis longirostris	40.2	53.6	34.32	5.4
Phaethornis longirostris	37.6	50.1333	28.79
Phaethornis longirostris	39.5	52.6667
Phaethornis longirostris	40	53.3333
Phaethornis longirostris	37.5	50
Phaethornis longirostris	42.8	57.0667
Phaethornis longirostris	40.5	54
Phaethornis longirostris	39.1	52.1333
Phaethornis longirostris	36.7	48.9333
Phaethornis longirostris	37.1	49.4667
Phaethornis longirostris	37	49.3333
Phaethornis longirostris	41.5	55.3333
Phaethornis longirostris	37.5	50
Phaethornis longirostris	42.5	56.6667
Phaethornis striigularis	20	26.6667	21.38
Phaethornis striigularis	19.5	26	26.37
Phaethornis striigularis	20.5	27.3333	30.21
Phaethornis striigularis	19.8	26.4	32.3	2
Phaethornis striigularis	21.3	28.4	19.83	2.5
Phaethornis striigularis	21.5	28.6667	21.9	2.5
Phaethornis striigularis	20	26.6667	25.8	3
Phaethornis striigularis	19.5	26	26.37	2.5
Phaethornis striigularis	20.2	26.9333	25.41	3
Phaethornis striigularis	20.8	27.7333	26.61	3
Phaethornis striigularis	19	25.3333	23.41	2.3
Phaethornis striigularis	21.1	28.1333	26.83	2.8
Phaethornis striigularis	20.1	26.8	22.18	2.5
Phaethornis striigularis	19	25.3333	24.34	2.6
Phaethornis striigularis	20.7	27.6
Phaethornis striigularis	22	29.3333
Phaethornis striigularis	22	29.3333
Phaethornis striigularis	21.5	28.6667
Phaethornis striigularis	21.3	28.4
Phaethornis striigularis	21	28
Amazilia candida	18	24	13.46
Amazilia candida	19	25.3333	22.04
Amazilia candida	17	22.6667	21.5	3.5
Amazilia candida	17	22.6667	17.84	3.5
Amazilia candida	17.5	23.3333	18.21	3.8
Amazilia candida	15.5	20.6667	16.55	3
Amazilia candida	16.5	22	22.31	3.8
Amazilia candida	17	22.6667	16.86	4
Amazilia candida	19	25.3333	16.43	2.4
Amazilia candida	17.5	23.3333	23.52	3.4
Amazilia candida	15	20	22.4	2.8
Amazilia candida	17	22.6667	16.96	3.2
Amazilia candida	17.5	23.3333	16.17	3.4
Amazilia candida	19	25.3333	16.33	3.4
Amazilia candida	18.5	24.6667	20.6
Amazilia candida	18.5	24.6667	15.89
Amazilia candida	17.5	23.3333	14.21
Amazilia candida	17.5	23.3333	13.72
Amazilia candida	18	24	17.5
Amazilia candida	17	22.6667	14.43
Amazilia candida	18.5	24.6667
Amazilia candida	18	24
Amazilia candida	20	26.6667
Amazilia candida	19	25.3333
Amazilia candida	15.5	20.6667
Amazilia candida	18	24
Amazilia candida	18	24
Amazilia candida	17.5	23.3333
Amazilia tzacatl	19.5	26	14.39
Amazilia tzacatl	19	25.3333	12.62
Amazilia tzacatl	20.2	26.9333	15.26
Amazilia tzacatl	20.5	27.3333	18.17	5.2
Amazilia tzacatl	22.8	30.4	19.5	4.8
Amazilia tzacatl	19	25.3333	17.04	4.5
Amazilia tzacatl	19.5	26	19.18	5
Amazilia tzacatl	20	26.6667	18.1	4.9
Amazilia tzacatl	19.3	25.7333	19.27	5.1
Amazilia tzacatl	19.5	26	20.9	4.5
Amazilia tzacatl	20.5	27.3333	10.79	5
Amazilia tzacatl	20	26.6667	17.09	5.1
Amazilia tzacatl	20.2	26.9333	15.62	5.2
Amazilia tzacatl	19.5	26
Amazilia tzacatl	21.8	29.0667
Amazilia tzacatl	20	26.6667
Amazilia tzacatl	24	32
Amazilia tzacatl	24	32
Amazilia tzacatl	23.5	31.3333
Amazilia tzacatl	22	29.3333
Amazilia tzacatl	21	28
Amazilia tzacatl	22.5	30
Amazilia tzacatl	22	29.3333
Amazilia tzacatl	19	25.3333
Amazilia tzacatl	22	29.3333
Amazilia tzacatl	21.5	28.6667
Amazilia tzacatl	21	28
Amazilia tzacatl	21	28
Amazilia tzacatl	21	28
Amazilia tzacatl	22	29.3333
